# Supplementary material
Source: PubMed Central journal article supplement (PMC2825114)
Supplement: NIHMS174179-supplement-S1.pdf [file NIHMS174179-supplement-S1.pdf]

### Supplementary Information S1

This supplementary information section presents three tables (Tables S2, S3, S4) that are provided as separate .xls files, and the literature citations associated with them are provided at the end of this .pdf file. The .xls files can serve as a reader resource that can be downloaded and modified for personal use, or additional support can be obtained at <http://www.lkcpharmaservices.com>.

**Table S2. Database of protein kinase targets for CNS indications.** This table provides the detailed background information for the protein kinase targets and small molecule inhibitors summarized in Tables 1 and 2 in the main text.

For inclusion in the Table S2 database, protein kinase targets were limited to those with CNS indications and those for which small molecule compounds are available either in disclosed clinical trials or published preclinical *in vivo* efficacy studies in an animal model. Table S2 delineates the protein kinase targets, type of kinase (S/T or Y), therapeutic indication, and compound status (listed either as preclinical or as the NCT number if in clinical trials). For each compound, the compound name, CAS registry number (where available), chemical structure (SMILES), computed molecular properties (LogP, MW, PSA) and CYP substrate status (where available) are given in distinct spreadsheet cells. Literature citations documenting brain uptake or CNS involvement are also listed for each compound when available. Molecular properties were computed using ACD Labs v.11 (Advanced Chemistry Development, Inc., Toronto).

**Table S3. Database of disclosed CNS-penetrant small molecules.** This table is a database of CNS-penetrant small molecules with information about brain uptake, *in vivo* activity, computed molecular properties and status as substrates or inhibitors of cytochrome P450 (CYP) and P-glycoprotein (Pgp) transport enzymes.

Table S3 includes CNS-penetrant small molecules, with public-disclosed *in vivo* brain uptake data mined from the literature. A series of structured literature searches in PubMed, SciFinder Scholar, and Google Scholar were done using the keyword terms “LogBB” or “pharmacokinetic and brain” or a successive keyword search using the terms “drug or therapeutic”, followed by the terms “brain”, then “blood” to further restrict each group. Analysis of the resultant literature hits was done by inspection to find small molecules for which published *in vivo* brain uptake data were available. To identify studies that addressed potential interactions with CYP or Pgp, keyword searching for each compound used the following phrases: "CYP", "disposition", "metabolism", "P-glycoprotein", "efflux". Articles obtained through these searches were inspected for relevant data. The corresponding literature citations indicating CYP or Pgp status are provided in the Supporting Information Literature Cited section below.

Drugs approved by the FDA for selected CNS indications (e.g., Alzheimer's disease, epilepsy, Parkinson's disease, migraine, and pain that required CNS penetrance as a mechanism of action) were also added to the collection. Although many of these FDA-approved drugs lack reported brain uptake data in the literature, incorporation of these compounds into the database is based upon the assumption that experimental uptake data exist in preclinical data not available to the public but exist as part of disclosures to the FDA or internal company requirements.

To assist with import of data into end-user computational programs or with user updates, each compound has a separate spreadsheet cell entry for the CAS registry number (when registered), chemical structure (SMILES), chemical formula, *in vivo* brain uptake information (logBB), computed molecular properties (LogP, MW, PSA), and *in vivo* administration information (animal, dosing, route). Citations to CNS literature are also included. A distribution analysis of the computed molecular properties of the Table S3 compounds demonstrates that the collection of molecules explores a normal distribution across a diverse range of multiple molecular properties, including A) LogP, B) MW and C) PSA. The mean LogP, MW, and PSA values (2.65, 310.09, 58.66) are consistent with the respective median values (2.70, 301.47, 55.25). The normal distribution provides support for the analysis of multi-property features of CNS-penetrant small molecules using the mean values as discussed in the main text.

Analysis of the mean values for computed molecular properties of CNS-penetrant small molecules reveals trends that are discussed in the main text. For example, PSA is the lone property in Table S3 to demonstrate a correlation with *in vivo* logBB values ( $r^2 = -0.58$ ). CNS-penetrant molecules had a significantly lower mean PSA value ( $58.92 \text{ \AA}^2$ ) than kinase inhibitor drugs (Table S4) or marketed drugs in general (dataset compiled by Vieth et al., 2004). Many of the kinase inhibitors listed in Table 1 possess PSA values far beyond this range. For example, the three mTOR inhibitors in clinical trials (everolimus, sirolimus and temsirolimus) all possess PSA values nearly four times higher. Other compounds in Table S3 with elevated PSA values ( $>120 \text{ \AA}^2$ ) show lower experimental brain uptake, with a mean logBB of -1.05. In general, compounds in Table S3 possess lower MW compared to kinase inhibitors (Table S2) and marketed drugs. Contrary to some prevailing assumptions, Table S3 compounds did not show a significant correlation of lipophilicity (logP) with *in vivo* logBB values.

Pgp-positive compounds in Table S2 possess higher LogP values versus Pgp-negative compounds (3.30 vs 2.45), have a higher mean PSA value compared to non-substrates (71.67 vs 55.80), and a higher MW (413.37 vs 300.37). The latter is consistent with previous reports (Varma, 2005) showing trends between molecular weight and substrate status. CYP3A4 substrates in Table S3 possess a higher mean LogP (3.43) than other CYP substrates (2.71). The mean PSA for CYP substrates ( $54.28 \text{ \AA}^2$ ) was similar to the mean PSA value for the full set of compounds in Table S3 ( $58.92 \text{ \AA}^2$ ).

**Table S4. Small molecule protein kinase inhibitor drugs (approved and in clinical trial).** This table is a listing of small molecule protein kinase inhibitors in clinical trials for any disease indication, and thus expands the analysis to those kinase inhibitor drugs with non-CNS indications compared to those in Table S2 with CNS indications.

The compounds included in Table S4 were selected based on a systematic search of the clinicaltrials.gov website. Search methods included using the keyword terms “kinase inhibitor”, then removing biologics and duplicate compounds. Compound structures were obtained from SciFinderScholar. For each compound, the kinase target, therapeutic indication, the compound name, chemical structure (SMILES), CAS registry number (when registered), and computed molecular properties (LogP, MW, PSA) are given.

Analysis of the molecular property profiles of these small molecule kinase inhibitor drugs in clinical development reveals interesting trends compared to the CNS-penetrant compounds in Table S3, as discussed in the main text.

The kinase inhibitor drugs in Table S4 show a higher MW and PSA compared to the Table S3 CNS-penetrant compounds.

## Literature Cited in Tables 2, S2, S3 and S4.

- Abraham, M.H., Chadha, H.S. & Mitchell, R.C. Hydrogen-bonding. Part 36. Determination of blood brain distribution using octanol-water partition coefficients. *Drug Des Discov* **13**, 123-131 (1995).
- Abraham, M.H., Ibrahim, A., Zhao, Y. & Acree, W.E., Jr. A data base for partition of volatile organic compounds and drugs from blood/plasma/serum to brain, and an LFER analysis of the data. *J. Pharm. Sci.* **95**, 2091-2100 (2006).
- Adams, V.R. & Leggas, M. Sunitinib malate for the treatment of metastatic renal cell carcinoma and gastrointestinal stromal tumors. *Clin Ther* **29**, 1338-1353 (2007).
- Adusumalli, V.E., Wichmann, J.K., Kucharczyk, N. & Sofia, R.D. Distribution of the anticonvulsant felbamate to cerebrospinal fluid and brain tissue of adult and neonatal rats. *Drug Metab. Dispos.* **21**, 1079-1085 (1993).
- Ahmed, M. et al. Bicyclic heteroaryl piperazines as selective brain penetrant 5-HT receptor antagonists. *Bioorg. Med. Chem. Lett.* **15**, 4867-4871 (2005).
- Aldini, G., Carini, M., Orioli, M., Facino, R.M. & Wenk, G.L. Metabolic profile of NO-flurbiprofen (HCT1026) in rat brain and plasma: a LC-MS study. *Life Sci.* **71**, 1487-1500 (2002).
- Alessandrini, A., Namura, S., Moskowitz, M. A. & Bonventre, J. V. MEK1 protein kinase inhibition protects against damage resulting from focal cerebral ischemia. *Proc. Natl. Acad. Sci. USA.* **96**, 12866-12869 (1999).
- Ando, Y., Fuse, E. & Figg, W.D. Thalidomide metabolism by the CYP2C subfamily. *Clin Cancer Res.* **8**, 1964-1973 (2002).
- Angell, R. et al. Biphenyl amide p38 kinase inhibitors 3: Improvement of cellular and in vivo activity. *Bioorg. Med. Chem. Lett.* **18**, 4428-4432 (2008).
- Anton, A.H. & Rodriguez, R.E. Drug-induced change in the distribution of sulfonamides in the mother rat and its fetus. *Science* **180**, 974-976 (1973).
- Apostol B., et al. CEP-1347 reduces mutant huntingtin-associated neurotoxicity and restores BDNF levels in R6/2 mice. *Mol. Cell. Neurosci.* **39**, 8-20 (2008).
- Arban, R. et al. Cyclopenta[d]pyrimidines and dihydropyrrrolo[2,3-d]pyrimidines as potent and selective corticotropin-releasing factor 1 receptor antagonists. *ChemMedChem* **2**, 528-540 (2007).
- Arendt, R.M., Greenblatt, D.J., Liebisch, D.C., Luu, M.D. & Paul, S.M. Determinants of benzodiazepine brain uptake: lipophilicity versus binding affinity. *Psychopharmacology* **93**, 72-76 (1987).
- Argenti, D. & D'Mello, A.P. The pharmacodynamics of desipramine and desmethyl-desipramine in rats. *J. Pharmacol. Exp. Ther.* **270**, 512-519 (1994).
- Arold, G. et al. No relevant interaction with alprazolam, caffeine, tolbutamide, and digoxin by treatment with a low-hyperforin St John's wort extract. *Planta Med* **71**, 331-337 (2005).
- Azuma, R. et al. Comparative analysis of in vitro and in vivo pharmacokinetic parameters related to individual variability of GTS-21 in canine. *Drug Metab Pharmacokinet* **17**, 75-82 (2002).
- Baker, D.E. Loperamide: a pharmacological review. *Rev Gastroenterol Disord* **7 Suppl 3**, S11-S18 (2007).
- Baltes, S., Fedrowitz, M., Tortos, C.L., Potschka, H. & Loscher, W. Valproic acid is not a substrate for P-glycoprotein or multidrug resistance proteins 1 and 2 in a number of in vitro and in vivo transport assays. *J. Pharmacol. Exp. Ther.* **320**, 331-343 (2007).
- Banker, D.E. et al. PK11195, a peripheral benzodiazepine receptor ligand, chemosensitizes acute myeloid leukemia cells to relevant therapeutic agents by more than one mechanism. *Leuk Res* **26**, 91-106 (2002).
- Barecki, M.E., Casciano, C.N., Johnson, W.W. & Clement, R.P. In vitro characterization of the inhibition profile of loratadine, desloratadine, and 3-OH-desloratadine for five human cytochrome P-450 enzymes. *Drug Metab. Dispos.* **29**, 1173-1175 (2001).
- Barone, F.C. et al. SB 239063, a second-generation p38 mitogen-activated protein kinase inhibitor, reduces brain injury and neurological deficits in cerebral focal ischemia. *J. Pharmacol. Exp. Ther.* **296**, 312-321 (2001).
- Bart, J. Quantitative assessment of P-glycoprotein function in the rat blood-brain barrier by distribution volume of [<sup>11</sup>C]verapamil measured with PET. *NeuroImage* **20**, 1775-1782 (2003).
- Baudry, S. et al. Stereoselective passage of mefloquine through the blood-brain barrier in the rat. *J Pharm Pharmacol* **49**, 1086-1090 (1997).
- Benedetti, M.S. et al. Comparative pharmacokinetics and metabolism of levetiracetam, a new anti-epileptic agent, in mouse, rat, rabbit and dog. *Xenobiotica* **34**, 281-300 (2004).
- Benetton, S.A. et al. P450 phenotyping of the metabolism of selegiline to desmethylselegiline and methamphetamine. *Drug Metab Pharmacokinet* **22**, 78-87 (2007).
- Bergström, M. et al. Blood-brain barrier penetration of zolmitriptan--modelling of positron emission tomography data. *J Pharmacokin Pharmacodyn* **33**, 75-91 (2006).
- Bertelsen, K.M., Greenblatt, D.J. & von Moltke, L.L. Apparent active transport of MDMA is not mediated by P-glycoprotein: a comparison with MDCK and Caco-2 monolayers. *Biopharm Drug Dispos* **27**, 219-227 (2006).
- Besret, L. et al. A comprehensive investigation of plasma and brain regional pharmacokinetics of imipramine and its metabolites during and after chronic administration in the rat. *J. Pharm. Sci.* **85**, 291-295 (1996).
- Beswick, P. et al. Identification of 2,3-diaryl-pyrazolo[1,5-b]pyridazines as potent and selective cyclooxygenase-2 inhibitors. *Bioorg. Med. Chem. Lett.* **14**, 5445-5448 (2004).
- Bhadauria, M., Nirala, S.K. & Shukla, S. Propolis protects CYP 2E1 enzymatic activity and oxidative stress induced by carbon tetrachloride. *Mol Cell Biochem* **302**, 215-224 (2007).
- Bjorkman, S. Prediction of the volume of distribution of a drug: which tissue-plasma partition coefficients are needed? *J Pharm Pharmacol* **54**, 1237-1245 (2002).
- Blakey, G.E., Nestorov, I.A., Arundel, P.A., Aarons, L.J. & Rowland, M. Quantitative structure-pharmacokinetics relationships: I. Development of a whole-body physiologically based model to characterize changes in pharmacokinetics across a homologous series of barbiturates in the rat. *J Pharmacokin Biopharm* **25**, 277-312 (1997).
- Boerner, S.A., Tourne, M.E., Kaufmann, S.H. & Bible, K.C. Effect of P-glycoprotein on flavopiridol sensitivity. *Br J Cancer* **84**, 1391-1396 (2001).
- Bogni, A. et al. Substrate specific metabolism by polymorphic cytochrome P450 2D6 alleles. *Toxicol In Vitro* **19**, 621-629 (2005).
- Bohlooli, S., Keyhanfar, F., Ghiaee, S. & Mahmoudian, M. Application of a new high performance liquid chromatography method to the pharmacokinetics of dibudipine in rats. *Journal of pharmacy & pharmaceutical sciences* **6**, 346-351 (2003).
- Bolander, H.G. & Wahlstrom G. Age-related changes in CNS-sensitivity to hexobarbital and thiopental in the rat. *Arch Int Pharmacodyn Ther* **267**, 213-223 (1984).
- Bonaventure, P., Nepomuceno, D., Mazur, C. & Lord, B. Characterization of JNJ-5207787 (N-(1-Acetyl-2,3-dihydro-1H-indol-6-yl)-3-(3-cyano-phenyl)-N-[1-(2-cyclopentyl-ethyl)-piperidin-4yl]-acrylamide), a small molecule antagonist of the neuropeptide Y Y2 receptor. *J. Pharmacol. Exp. Ther.* **308**, 1130-1137 (2004).
- Bondioliotti, G., Pollera, C., Pirola, R. & Bareggi, S. Determination of 5-chloro-7-iodo-8-quinolinol (clioquinol) in plasma and tissues of

- hamsters by high-performance liquid chromatography and electrochemical detection. *J Chromatogr B* **837**, 87-91 (2006).
- Boni, J. et al. Pharmacokinetic profile of temsirolimus with concomitant administration of cytochrome p450-inducing medications. *J. Clin. Pharmacol.* **47**, 1430-1439 (2007).
- Bostrom, E. In vivo blood-brain barrier transport of oxycodone in the rat: indications for active influx and implications for pharmacokinetics/pharmacodynamics. *Drug Metab. Dispos.* **34**, 1624-1631 (2006).
- Bourasset, F. Neuropharmacokinetics of a new alpha-amino-3-hydroxy-t-methyl-4-isoxazole propionic acid (AMPA) modulator, S18986 [(S)-2,3-dihydro-[3,4]cyclopentano-1,2,4-benzothiadiazine-1,1-dioxide], in the rat. *Drug Metab. Dispos.* **33**, 1137-1143 (2005).
- Bramness, J.G. et al. The CYP2C19 genotype and the use of oral contraceptives influence the pharmacokinetics of carisoprodol in healthy human subjects. *Eur J. Clin. Pharmacol.* **61**, 499-506 (2005).
- Breedveld, P. et al. The effect of Bcrp1 (Abcg2) on the in vivo pharmacokinetics and brain penetration of imatinib mesylate (Gleevec): implications for the use of breast cancer resistance protein and P-glycoprotein inhibitors to enable the brain penetration of imatinib in patients. *Cancer Res.* **65**, 2577-2582 (2005).
- Bristow, L.J., Hutson, P.H., Kulagowski, J.J. & Leeson, P.D. Anticonvulsant and behavioral profile of L-701,324, a potent, orally active antagonist at the glycine modulatory site on the N-methyl-D-aspartate receptor complex. *J. Pharmacol. Exp. Ther.* **279**, 492-501 (1996).
- Brockmoller, J. et al. The impact of the CYP2D6 polymorphism on haloperidol pharmacokinetics and on the outcome of haloperidol treatment. *Clin Pharmacol Ther* **72**, 438-452 (2002).
- Broniscer, A. et al. Phase I and pharmacokinetic studies of erlotinib administered concurrently with radiotherapy for children, adolescents, and young adults with high-grade glioma. *Clin. Cancer Res.* **15**, 701-707 (2009).
- Bundgaard, C., Jørgensen, M. & Larsen, F. Pharmacokinetic modelling of blood-brain barrier transport of escitalopram in rats. *Biopharm. Drug Dispos.* **28**, 349-360 (2007).
- Busse, D., Cosme, J., Beaune, P., Kroemer, H.K. & Eichelbaum, M. Cytochromes of the P450 2C subfamily are the major enzymes involved in the O-demethylation of verapamil in humans. *Naunyn Schmiedebergs Arch Pharmacol* **353**, 116-121 (1995).
- Büyükaşar K., et al. Rho-kinase inhibitor, Y-27632, has an antinociceptive effect in mice. *Eur. J. Pharmacol.* **541**, 49-52 (2006).
- Caccia, S. & Fong, M.H. Kinetics and distribution of the beta-adrenergic agonist salbutamol in rat brain. *J Pharm Pharmacol* **36**, 200-202 (1984).
- Caccia, S., Fossati, T. & Mancinelli, A. Disposition and metabolism of minaprine in the rat. *Xenobiotica* **15**, 1111-1119 (1985).
- Caccia, S., Garattini, S., Mancinelli, A. & Muglia, M. Identification and quantitation of 1-(2-pyrimidinyl)piperazine, an active metabolite of the anxiolytic agent buspirone, in rat plasma and brain. *J Chromatogr* **252**, 310-314 (1982).
- Calcutt, C.R. et al. Zolantidine (SK&F 95282) is a potent selective brain-penetrating histamine H2-receptor antagonist. *Br. J. Pharmacol.* **93**, 69-78 (1988).
- Callaghan, J.T., Bergstrom, R.F., Ptak, L.R. & Beasley, C.M. Olanzapine. Pharmacokinetic and pharmacodynamic profile. *Clin. Pharmacokinet.* **37**, 177-193 (1999).
- Carboni S., et al. AS601245, a c-Jun NH2-terminal kinase (JNK) inhibitor, reduces axon/dendrite damage and cognitive deficits after global cerebral ischaemia in gerbils. *Br. J. Pharmacol.* **153**, 157-163 (2008).
- Carr K. D., de Vaca S. C., Sun Y., Chau L. S., Pan Y. & Dela Cruz J. Effects of the MEK inhibitor, SL-327, on rewarding, motor- and cellular-activating effects of D: -amphetamine and SKF-82958, and their augmentation by food restriction in rat. *Psychopharmacology* **201**, 495-506 (2009).
- Carlsson, A. & Hultengren, M. Exposure to methylene chloride. III. Metabolism of 14C-labelled methylene chloride in rat. *Scand J Work Environ Health* **1**, 104-108 (1975).
- Carrillo, J.A. et al. Pharmacokinetic interaction of fluvoxamine and thioridazine in schizophrenic patients. *J Clin Psychopharmacol* **19**, 494-499 (1999).
- Castel-Branco, M. Relationship between plasma and brain levels and the anticonvulsant effect of lamotrigine in rats. *Eur J Pharm* **482**, 163-168 (2003).
- Cavallito, J.C. et al. Lipid-soluble inhibitors of dihydrofolate reductase. I. Kinetics, tissue distribution, and extent of metabolism of pyrimethamine, metoprine, and etoprine in the rat, dog, and man. *Drug Metab. Dispos.* **6**, 329-337 (1978).
- Chan, A.T., Tranah, G.J., Giovannucci, E.L., Hunter, D.J. & Fuchs, C.S. A prospective study of genetic polymorphisms in the cytochrome P-450 2C9 enzyme and the risk for distal colorectal adenoma. *Clin Gastroenterol Hepatol* **2**, 704-712 (2004).
- Chang, M., Sood, V.K., Wilson, G.J. & Kloosterman, D.A. Metabolism of the HIV-1 reverse transcriptase inhibitor delavirdine in mice. *Drug Metab. Dispos.* **25**, 828-839 (1997).
- Charlier, C. et al. Polymorphisms in the CYP2D6 gene: association with plasma concentrations of fluoxetine and paroxetine. *Ther Drug Monit* **25**, 738-742 (2003).
- Chen, C., Hanson, E., Watson, J.W. & Lee, J.S. P-glycoprotein limits the brain penetration of non-sedating but not sedating H1-antagonists. *Drug Metab. Dispos.* **31**, 312-318 (2003).
- Chen, C., Lin, J., Smolarek, T. & Tremaine, L. P-glycoprotein has differential effects on the disposition of statin acid and lactone forms in mdr1a/b knockout and wild-type mice. *Drug Metab. Dispos.* **35**, 1725-1729 (2007).
- Cheung H. H., Teves L., Wallace M. C. & Gurd J. W. Inhibition of protein kinase C reduces ischemia-induced tyrosine phosphorylation of the N-methyl-d-aspartate receptor. *J. Neurochem.* **86**, 1441-1449 (2003).
- Chou, R.C. & Levy, G. Effect of heparin or salicylate infusion on serum protein binding and on concentrations of phenytoin in serum, brain and cerebrospinal fluid of rats. *J. Pharmacol. Exp. Ther.* **219**, 42-48 (1981).
- Chu, W. et al. Association between CYP3A4 genotype and risk of endometrial cancer following tamoxifen use. *Carcinogenesis* **28**, 2139-2142 (2007).
- Chung, W.G., Park, C.S., Roh, H.K., Lee, W.K. & Cha, Y.N. Oxidation of ranitidine by isozymes of flavin-containing monooxygenase and cytochrome P450. *Jpn J Pharmacol* **84**, 213-220 (2000).
- Ciruela A., et al. Identification of MEK1 as a novel target for the treatment of neuropathic pain. *Br. J. Pharmacol.* **138**, 751-756 (2003).
- Cloughesy, T. F. et al. Antitumor activity of rapamycin in a Phase I trial for patients with recurrent PTEN-deficient glioblastoma. *PLoS Med.* **5**, e8 (2008).
- Colburn, D.E., Giles, F.J., Oladovich, D. & Smith, J.A. In vitro evaluation of cytochrome P450-mediated drug interactions between cytarabine, idarubicin, itraconazole and caspofungin. *Hematology* **9**, 217-221 (2004).
- Collino M., et al. Treatment with the glycogen synthase kinase-3beta inhibitor, TDZD-8, affects transient cerebral ischemia/reperfusion injury in the rat hippocampus. *Shock* **30**, 299-307 (2008).

- Conforti, P., *et al.* Blood level of brain-derived neurotrophic factor mRNA is progressively reduced in rodent models of Huntington's disease: restoration by the neuroprotective compound CEP-1347. *Mol. Cell Neurosci.* **39**, 1-7 (2008).
- Coroneos, N.J. *et al.* Distribution of pentazocine in blood and brain of the baboon following intravenous injection. *Br. J. Pharmacol.* **50**, 393-398 (1974).
- Courad, J.P. *et al.* Acetaminophen distribution in the rat central nervous system. *Life Sci.* **69**, 1455-1464 (2001).
- Cousein, E. *et al.* P-glycoprotein and cytochrome P450 3A4 involvement in risperidone transport using an in vitro Caco-2/TC7 model and an in vivo model. *Prog Neuropsychopharmacol Biol Psychiatry* **31**, 878-886 (2007).
- Cowper-Smith C. D., Anger G. J. A., Magal E., Norman M. H. & Robertson G. S. Delayed administration of a potent cyclin dependent kinase and glycogen synthase kinase 3 beta inhibitor produces long-term neuroprotection in a hypoxia-ischemia model of brain injury. *Neurosci.* **155**, 864-875 (2008).
- Craft J. M., Watterson D. M., Frautschy S. A. & Van Eldik L. J. Aminopyridazines inhibit beta-amyloid-induced glial activation and neuronal damage in vivo. *Neurobiol. Aging* **25**, 1283-1292 (2004).
- Crivori, P., Reinach, B., Pezzetta, D. & Poggesi, I. Computational models for identifying potential P-glycoprotein substrates and inhibitors. *Mol Pharm* **3**, 33-44 (2006).
- Cube, R. *et al.* 3-(2-Ethoxy-4-{4-[3-hydroxy-2-methyl-4-(3-methylbutanoyl)phenoxy]butoxy}phenyl)propanoic acid: a brain penetrant allosteric potentiator at the metabotropic glutamate receptor 2 (mGluR2). *Bioorg. Med. Chem. Lett.* **15**, 2389-2393 (2005).
- Cummins, C.L., Jacobsen, W., Christians, U. & Benet, L.Z. CYP3A4-transfected Caco-2 cells as a tool for understanding biochemical absorption barriers: studies with sirolimus and midazolam. *J. Pharmacol. Exp. Ther.* **308**, 143-155 (2004).
- Cunningham, C.W. *et al.* Opioids and efflux transporters. Part 2: P-glycoprotein substrate activity of 3- and 6-substituted morphine analogs. *J. Med. Chem.* **51**, 2316-2320 (2008).
- Cuzzocrea S., *et al.* Glycogen synthase kinase-3beta inhibition reduces secondary damage in experimental spinal cord trauma. *J. Pharmacol. Exp. Ther.* **318**, 79-89 (2006).
- Cvetkovic, M., Leake, B., Fromm, M.F., Wilkinson, G.R. & Kim, R.B. OATP and P-glycoprotein transporters mediate the cellular uptake and excretion of fexofenadine. *Drug Metab. Dispos.* **27**, 866-871 (1999).
- da Cunha J. M., Rae G. A., Ferreira S. H. & de Q Cunha F. Endothelins induce ETB receptor-mediated mechanical hypernociception in rat hindpaw: roles of cAMP and protein kinase C. *Eur. J. Pharm.* **501**, 87-94 (2004).
- Dai, H., Marbach, P., Lemaire, M., Hayes, M. & Elmquist, W.F. Distribution of STI-571 to the brain is limited by P-glycoprotein-mediated efflux. *J. Pharmacol. Exp. Ther.* **304**, 1085-1092 (2003).
- Daugherty, M.S., Ludden, T.M. & Burk, R.F. Metabolism of ethane and pentane to carbon dioxide by the rat. *Drug Metab. Dispos.* **16**, 666-671 (1988).
- Davies, N.M. Clinical pharmacokinetics of ibuprofen. The first 30 years. *Clin. Pharmacokinet.* **34**, 101-154 (1998).
- Dawson, R. *et al.* Solid-phase extraction and HPLC assay of nicotine and cotinine in plasma and brain. *Toxicol Mech Methods* **12**, 45-58 (2002).
- de Bouard, S. *et al.* Antiangiogenic and anti-invasive effects of sunitinib on experimental human glioblastoma. *Neuro-oncology* **9**, 412-423 (2007).
- DeVane, C.L. *et al.* Single-dose pharmacokinetics of methylphenidate in CYP2D6 extensive and poor metabolizers. *J Clin Psychopharmacol* **20**, 347-349 (2000).
- Devries, E. *et al.* Can celecoxib affect P-glycoprotein-mediated drug efflux? A microPET study. *Nuclear Medicine and Biology* **35**, 459-466 (2008).
- Dewhurst S., Maggirwar S. B., Schifitto G., Gendelman H. E. & Gelbard H. A. Glycogen synthase kinase 3 beta (GSK-3 beta) as a therapeutic target in neuroAIDS. *J. Neuroimmune. Pharmacol.* **2**, 93-96 (2006).
- Dewil M., dela Cruz V. F., Van Den Bosch L. & Robberecht W. Inhibition of p38 mitogen activated protein kinase activation and mutant SOD1(G93A)-induced motor neuron death. *Neurobiol. Dis.* **26**, 332-341 (2007).
- Di Marco, A., Yao, D. & Lauffer, R. Demethylation of radiolabelled dextromethorphan in rat microsomes and intact hepatocytes. *Eur J Biochem* **270**, 3768-3777 (2003).
- Dinovo, E.C., Bost, R.O., Sunshine, I. & Gottschalk, L.A. Distribution of thioridazine and its metabolites in human tissues and fluids obtained postmortem. *Clin Chem* **24**, 1826-1830(1978).
- Doran, A. *et al.* The impact of p-glycoprotein on the disposition of drugs targeted for indications of the central nervous system: evaluation using the MDR1A/1B knockout mouse model. *Drug Metab. Dispos.* **33**, 165-174 (2004).
- Dostalek, M. *et al.* Effect of methamphetamine on the pharmacokinetics of dextromethorphan and midazolam in rats. *Eur J Drug Metab Pharmacokinet* **30**, 195-201 (2005).
- Doze, P. *et al.* Synthesis and evaluation of radiolabeled antagonists for imaging of beta-adrenoceptors in the brain with PET. *Neurochem Int* **40**, 145-155 (2002).
- Dutta, S. *et al.* Steady-state propofol brain:plasma and brain:blood partition coefficients and the effect-site equilibration paradox. *British journal of anaesthesia* **81**, 422-424 (1998).
- Eagling, V.A., Howe, J.L., Barry, M.J. & Back, D.J. The metabolism of zidovudine by human liver microsomes in vitro: formation of 3'-amino-3'-deoxythymidine. *Biochem. Pharmacol.* **48**, 267-276 (1994).
- Einat, H., Yuan, P., Szabo, S. T., Dogra, S., Manji, H. K. Protein kinase C inhibition by tamoxifen antagonizes manic-like behavior in rats: implications for the development of novel therapeutics for bipolar disorder. *Neuropsychobiology* **55**, 123-131 (2007).
- El-Gizawy, S.A. & Hedaya, M.A. Comparative brain tissue distribution of camptothecin and topotecan in the rat. *Cancer Chemother Pharmacol* **43**, 364-370 (1999).
- El-Sheikh, A.A., van den Heuvel, J.J., Koenderink, J.B. & Russel, F.G. Interaction of nonsteroidal anti-inflammatory drugs with multidrug resistance protein (MRP) 2/ABCC2- and MRP4/ABCC4-mediated methotrexate transport. *J. Pharmacol. Exp. Ther.* **320**, 229-235 (2007).
- Engel T., Lucas J. J., Hernández F. & Avila J. A mouse model to study tau pathology related with tau phosphorylation and assembly. *J. Neurol. Sci.* **257**, 250-254 (2007).
- Erickson, S.D. *et al.* Potent, selective MCH-1 receptor antagonists. *Bioorg. Med. Chem. Lett.* **18**, 1402-1406 (2008).
- Evans, D.C. *et al.* Eletriptan metabolism by human hepatic CYP450 enzymes and transport by human P-glycoprotein. *Drug Metab. Dispos.* **31**, 861-869 (2003).
- Faassen, F., Vogel, G., Spanings, H. & Vromans, H. Caco-2 permeability, P-glycoprotein transport ratios and brain penetration of heterocyclic drugs. *Int J Pharm* **263**, 113-122 (2003).
- Feng, Y. *et al.* Discovery of substituted 4-(pyrazol-4-yl)-phenylbenzodioxane-2-carboxamides as potent and highly selective Rho kinase (ROCK-II) inhibitors. *J. Med. Chem.* **51**, 6642-6645 (2008).
- Ferraccioli G. F. VX-745 Vertex Pharmaceuticals. *Curr. Opin. Anti-Inflamm. Immun. Invest. Drugs* **2**, 74-77 (2000).
- Fine, R.L. *et al.* Randomized study of paclitaxel and tamoxifen deposition into human brain tumors: implications for the treatment of

- metastatic brain tumors. *Clin Cancer Res.* **12**, 5770-5776 (2006).
- Fiserova-Begerova, V. & Kawiecki, R. W. Effects of exposure concentrations on distribution of halothane metabolites in the body. *Drug Metab. Dispos.* **12**, 98-105 (1984).
- Fletcher, S.R. et al. 4-(Phenylsulfonyl)piperidines: novel, selective, and bioavailable 5-HT(2A) receptor antagonists. *J. Med. Chem.* **45**, 492-503 (2002).
- Fogelman, S.M. et al. O- and N-demethylation of venlafaxine in vitro by human liver microsomes and by microsomes from cDNA-transfected cells: effect of metabolic inhibitors and SSRI antidepressants. *Neuropsychopharmacology* **20**, 480-490 (1999).
- Fournier A. E., Takizawa B. T. & Strittmatter S. M. Rho kinase inhibition enhances axonal regeneration in the injured CNS. *J. Neurosci.* **23**, 1416-1423 (2003).
- Frick, L.W. et al. Pharmacokinetics, oral bioavailability, and metabolic disposition in rats of (-)-cis-5-fluoro-1-[2-(hydroxymethyl)-1,3-oxathiolan-5-yl] cytosine, a nucleoside analog active against human immunodeficiency virus and hepatitis B virus. *Antimicrob Agents Chemother* **37**, 2285-2292 (1993).
- Fuller, R.W., Snoddy, H.D. & Perry, K.W. Tissue distribution, metabolism and effects of bufotenine administered to rats. *Neuropharmacology* **34**, 799-804 (1995).
- Gabrielsson, J. & Bondesson, U. Constant-rate infusion of nicotine and cotinine. I. A physiological pharmacokinetic analysis of the cotinine disposition, and effects on clearance and distribution in the rat. *J Pharmacokinet Biopharm* **15**, 583-599 (1987).
- Geneste, H. et al. Synthesis and SAR of highly potent and selective dopamine D3-receptor antagonists: Variations on the 1H-pyrimidin-2-one theme. *Bioorg. Med. Chem. Lett.* **16**, 1934-1937 (2006).
- Ghanayem, B.I. & Hoffer, U. Investigation of xenobiotics metabolism, genotoxicity, and carcinogenicity using Cyp2e1(-/-) mice. *Curr Drug Metab* **8**, 728-749 (2007).
- Glicksman, M.A., et al. CEP-1347/KT7515 prevents motor neuronal programmed cell death and injury-induced dedifferentiation in vivo. *J. Neurobiol.* **35**, 361-370 (1998).
- Glue, P. et al. Pharmacokinetic interactions with felbamate. In vitro-in vivo correlation. *Clin. Pharmacokinet.* **33**, 214-224 (1997).
- Glynn, S.L. & Yazdanian, M. In vitro blood-brain barrier permeability of nevirapine compared to other HIV antiretroviral agents. *J. Pharm. Sci.* **87**, 306-310 (1998).
- Goetz, M.P. et al. The impact of cytochrome P450 2D6 metabolism in women receiving adjuvant tamoxifen. *Breast Cancer Res. Treat* **101**, 113-121 (2007).
- Goudar, R.K. et al. Combination therapy of inhibitors of epidermal growth factor receptor/vascular endothelial growth factor receptor 2 (AEE788) and the mammalian target of rapamycin (RAD001) offers improved glioblastoma tumor growth inhibition. *Molecular Cancer Therapeutics* **4**, 101-112 (2005).
- Grace, R.F., Edwards, S.R., Mather, L.E., Lin, Y. & Power, I. Central and peripheral tissue distribution of diclofenac after subcutaneous injection in the rat. *Inflammopharmacology* **8**, 43-54 (2000).
- Graff, C.L., Zhao, R. & Pollack, G.M. Pharmacokinetics of substrate uptake and distribution in murine brain after nasal instillation. *Pharm. Res.* **22**, 235-244 (2005).
- Granfors, M.T. et al. Differential inhibition of cytochrome P450 3A4, 3A5 and 3A7 by five human immunodeficiency virus (HIV) protease inhibitors in vitro. *Basic Clin Pharmacol. Toxicol.* **98**, 79-85 (2006).
- Greig, N.H. et al. High-performance liquid chromatographic analysis of chlorambucil tert.-butyl ester and its active metabolites chlorambucil and phenylacetic mustard in plasma and tissue. *J Chromatogr* **534**, 279-286 (1990).
- Gu Z., Jiang, Q. & Zhang, G. Extracellular signal-regulated kinase and c-Jun N-terminal protein kinase in ischemic tolerance. *NeuroReport* **12**, 3487-3491 (2001).
- Guengerich, F.P., Muller-Enoch, D. & Blair, I.A. Oxidation of quinidine by human liver cytochrome P-450. *Mol Pharmacol* **30**, 287-295 (1986).
- Guiso, G., Fracasso, C., Caccia, S. & Abbiati, A. Determination of ranitidine in rat plasma and brain by high-performance liquid chromatography. *J Chromatogr* **413**, 363-369 (1987).
- Guitton, J. et al. Possible involvement of multiple human cytochrome P450 isoforms in the liver metabolism of propofol. *Br J Anaesth* **80**, 788-795 (1998).
- Habgood, M.D., Knott, G.W., Dziegielewska, K.M. & Saunders, N.R. Permeability of the developing and mature blood-brain barriers to theophylline in rats. *Clin Exp Pharmacol Physiol* **25**, 361-368 (1998).
- Hagan, J.J. et al. Characterization of SB-269970-A, a selective 5-HT(7) receptor antagonist. *Br. J. Pharmacol.* **130**, 539-548 (2000).
- Hall, A. et al. Discovery of brain penetrant, soluble, pyrazole amide EP1 receptor antagonists. *Bioorg. Med. Chem. Lett.* **18**, 4027-4032 (2008).
- Hamilton, K.O., Yazdanian, M.A. & Audus, K.L. Modulation of P-glycoprotein activity in Calu-3 cells using steroids and beta-ligands. *Int J Pharm* **228**, 171-179 (2001).
- Hamitouche, S., Poupon, J., Dreano, Y., Amet, Y. & Lucas, D. Ethanol oxidation into acetaldehyde by 16 recombinant human cytochrome P450 isoforms: role of CYP2C isoforms in human liver microsomes. *Toxicol Lett* **167**, 221-230 (2006).
- Hara H., Onodera H., Yoshidomi M., Matsuda Y. & Kogure K. Staurosporine, a novel protein kinase C inhibitor, prevents postischemic neuronal damage in the gerbil and rat. *J. Cereb. Blood Flow Metab.* **10**, 646-653 (1990).
- Harada, K., Aota, M., Inoue, T., Matsuda, R. & Mihara, T. Anxiolytic activity of a novel potent serotonin 5-HT2C receptor antagonist FR260010. *Eur. J. Pharmacol.* **553**, 171-184 (2006).
- Hase, I. et al. Area under the plasma concentration-time curve of inorganic fluoride following sevoflurane anesthesia correlates with CYP2E1 mRNA level in mononuclear cells. *Anesthesiology* **92**, 1661-1666 (2000).
- Hattori, K. et al. Rational design of conformationally restricted quinazolinone inhibitors of poly(ADP-ribose)polymerase. *Bioorg. Med. Chem. Lett.* **17**, 5577-5581 (2007).
- Hay, D.W. et al. Nonpeptide tachykinin receptor antagonists. III. SB 235375, a low central nervous system-penetrant, potent and selective neurokinin-3 receptor antagonist, inhibits citric acid-induced cough and airways hyper-reactivity in guinea pigs. *J. Pharmacol. Exp. Ther.* **300**, 314-323 (2002).
- Hayeshi, R., Masimirembwa, C., Mukanganyama, S. & Ungell, A.L. The potential inhibitory effect of antiparasitic drugs and natural products on P-glycoprotein mediated efflux. *Eur. J. Pharm. Sci.* **29**, 70-81 (2006).
- Heise, E.R. & Kimbel, K.H. [Experiments on the effect of 3, 5-dioxo-1, 2-diphenyl-4-n-butyl-pyrazolidine. I. Distribution in organism after a single intravenous injection.]. *Arzneimittelforschung* **6**, 722-724 (1956).
- Hesse, L.M., Venkatakrisnan, K., von Moltke, L.L., Shader, R.I. & Greenblatt, D.J. CYP3A4 is the major CYP isoform mediating the in vitro hydroxylation and demethylation of flunitrazepam. *Drug Metab. Dispos.* **29**, 133-140 (2001).

- Hilton G. D., Stoica B. A., Byrnes K. R. & Faden A. I. Roscovitine reduces neuronal loss, glial activation, and neurologic deficits after brain trauma. *J. Cereb. Blood Flow Metab.* **28**, 1845-1859 (2008).
- Hinners I., Hill A., Otto U., Michalsky A., Mack T. G. & Strigrow F. Tau kinase inhibitors protect hippocampal synapses despite of insoluble tau accumulation. *Mol. Cell. Neurosci.* **37**, 559-567 (2008).
- Hirose, H. et al. Pharmacological Properties of (2R)-N-[1-(6-Aminopyridin-2-ylmethyl) piperidin-4-yl]-2-[(1R)-3, 3-difluorocyclopentyl]-2-hydroxy-2-phenylacetamide: A Novel Muscarinic Antagonist with M-Sparing Antagonistic Activity. *J. Pharmacol. Exp. Ther.* **297**, 790-797 (2001).
- Holmberg, B., Jakobson, I. & Sigvardsson, K. A study on the distribution of methylchloroform and n-octane in the mouse during and after inhalation. *Scand J Work Environ Health* **3**, 43-52 (1977).
- Hosseini-Yeganeh, M. & McLachlan, A.J. Tissue distribution of terbinafine in rats. *J. Pharm. Sci.* **90**, 1817-1828 (2001).
- Hsiao, P. et al. Verapamil P-glycoprotein transport across the rat blood-brain barrier: cyclosporine, a concentration inhibition analysis, and comparison with human data. *J. Pharmacol. Exp. Ther.* **317**, 704-710 (2006).
- Hu, W. et al. Development of a novel therapeutic suppressor of brain proinflammatory cytokine up-regulation that attenuates synaptic dysfunction and behavioral deficits. *Bioorg. Med. Chem. Lett.* **17**, 414-418 (2007).
- Hua, J., Pero, R.W. & Kane, R. Pharmacokinetics and central nervous system toxicity of declopramide (3-chloroprocainamide) in rats and mice. *Anticancer Drugs* **10**, 79-88 (1999).
- Huang, Y., Liao, J. & Tsai, T. Concurrent determination of thalidomide in rat blood, brain and bile using multiple microdialysis coupled to liquid chromatography. *Biomed. Chromatogr.* **19**, 488-493 (2005).
- Hudkins, R.L., et al. Mixed lineage kinase 1 and mixed-lineage kinase 3 subtype-selective dihydronaphthyl[3,4-a]pyrrolo[3,4-c]carbazole-5-ones: optimization, mixed-lineage kinase 1 crystallography, and oral in vivo activity in 1-methyl-4-phenyltetrahydropyridine models. *J. Med. Chem.* **51**, 5680-5689 (2008).
- Humpel, M., Toda, T., Oshino, N. & Pommerenke, G. The pharmacokinetics of lisuride hydrogen maleate in rat, rabbit and rhesus monkey. *Eur J Drug Metab Pharmacokin* **6**, 207-219 (1981).
- Hurh, E. et al. Effects of physostigmine on the pharmacokinetics of intravenous parathion in rats. *Biopharm Drug Dispos* **21**, 331-338 (2000).
- Hutchinson, M.R., Menelaou, A., Foster, D.J., Collier, J.K. & Somogyi, A.A. CYP2D6 and CYP3A4 involvement in the primary oxidative metabolism of hydrocodone by human liver microsomes. *Br J. Clin. Pharmacol.* **57**, 287-297 (2004).
- Ichikawa, N., Naora, K., Hirano, H. & Iwamoto, K. Quantitation of acetazolamide in rat plasma, brain tissue and cerebrospinal fluid by high-performance liquid chromatography. *J Pharm Biomed Anal* **17**, 1415-1421 (1998).
- Inan S & Büyükcakar K. Antiepileptic effects of two Rho-kinase inhibitors, Y-27632 and fasudil, in mice. *Br. J. Pharmacol.* **155**, 44-51 (2008).
- Inglis K., et al. Polo-like kinase 2 (PLK2) phosphorylates alpha-synuclein at serine 129 in central nervous system. *J. Biol. Chem.* **284**, 2598-2602 (2009).
- Irie, O. et al. Overcoming hERG issues for brain-penetrating cathepsin S inhibitors: 2-Cyanopyrimidines. Part 2. *Bioorg. Med. Chem. Lett.* **18**, 5280-5284 (2008).
- Ishizaki, J. et al. Effect of sequence of administration on the pharmacokinetic interaction between the anticholinergic drug biperiden and [3H]quinuclidinyl benzylate or [3H]N-methylscopolamine in rats. *J Pharmacy Pharmacol* **50**, 189-196 (1998).
- Ito T., et al. Glial phosphorylated p38 MAP kinase mediates pain in a rat model of lumbar disc herniation and induces motor dysfunction in a rat model of lumbar spinal canal stenosis. *Spine* **32**, 159-167 (2007).
- Ito T., et al. Rho kinase inhibitor improves motor dysfunction and hypoalgesia in a rat model of lumbar spinal canal stenosis. *Spine* **32**, 2070-2075 (2007).
- Jadhav V., Matchett G., Hsu F. P. & Zhang J. H. Inhibition of Src tyrosine kinase and effect on outcomes in a new in vivo model of surgically induced brain injury. *J. Neurosurg.* **106**, 680-686 (2007).
- Jan, K.C., Ho, C.T. & Hwang, L.S. Bioavailability and tissue distribution of sesamol in rat. *J Agric Food Chem* **56**, 7032-7037 (2008).
- Jane, E. P., Premkumar, D. R. & Pollack I. F. Coadministration of sorafenib with rottlerin potently inhibits cell proliferation and migration in human malignant glioma cells. *J. Pharmacol. Exp. Ther.* **319**, 1070-1080 (2006).
- Javadi, J.I. & Davis, J.M. Cocaine disposition in discrete regions of rat brain. *Biopharm. Drug Dispos.* **14**, 357-364 (1993).
- Jhee, S.S., Shiovitz, T., Crawford, A.W. & Cutler, N.R. Pharmacokinetics and pharmacodynamics of the triptan antimigraine agents: a comparative review. *Clin. Pharmacokinet.* **40**, 189-205 (2001).
- Jonker, J.W. et al. Role of blood-brain barrier P-glycoprotein in limiting brain accumulation and sedative side-effects of asimadoline, a peripherally acting analgesic drug. *Br. J. Pharmacol.* **127**, 43-50 (1999).
- Jost, L.M. et al. Metabolism and disposition of vatalanib (PTK787/ZK-222584) in cancer patients. *Drug Metab. Dispos.* **34**, 1817-1888 (2006).
- Kalgutkar, A.S. et al. Metabolic activation of the nontricyclic antidepressant trazodone to electrophilic quinone-imine and epoxide intermediates in human liver microsomes and recombinant P4503A4. *Chem Biol Interact* **155**, 10-20 (2005).
- Kalvass, J., Maurer, T. & Pollack, G. Use of Plasma and Brain Unbound Fractions to Assess the Extent of Brain Distribution of 34 Drugs: Comparison of Unbound Concentration Ratios to in Vivo P-Glycoprotein Efflux Ratios. *Drug Metab. Dispos.* **35**, 660-666 (2007).
- Kamath, A.V., Chong, S., Chang, M. & Marathe, P.H. P-glycoprotein plays a role in the oral absorption of BMS-387032, a potent cyclin-dependent kinase 2 inhibitor, in rats. *Cancer Chemother Pharmacol* **55**, 110-116 (2005).
- Kamath, A.V., Wang, J., Lee, F.Y. & Marathe, P.H. Preclinical pharmacokinetics and in vitro metabolism of dasatinib (BMS-354825): a potent oral multi-targeted kinase inhibitor against SRC and BCR-ABL. *Cancer Chemother Pharmacol* **61**, 365-376 (2008).
- Kaplan, G.B., Greenblatt, D.J., Leduc, B.W., Thompson, M.L. & Shader, R.I. Relationship of plasma and brain concentrations of caffeine and metabolites to benzodiazepine receptor binding and locomotor activity. *J. Pharmacol. Exp. Ther.* **248**, 1078-1083 (1989).
- Karunakaran S., et al. Selective activation of p38 mitogen-activated protein kinase in dopaminergic neurons of substantia nigra leads to nuclear translocation of p53 in 1-methyl-4-phenyl-1,2,3,6-tetrahydropyridine-treated mice. *J. Neurosci.* **28**, 12500-12509 (2008).
- Kato, T., Inubushi, T. & Takahashi, S. Relationship of lithium concentrations in the brain measured by lithium-7 magnetic resonance spectroscopy to treatment response in mania. *J Clin Psychopharmacol* **14**, 330-335 (1994).
- Kaye, C.M. & Nicholls, B. Clinical pharmacokinetics of ropinirole. *Clin. Pharmacokinet.* **39**, 243-254 (2000).
- Kelder, J., Grootenhuis, P.D., Bayada, D.M., Delbressine, L.P. & Ploemen, J.P. Polar molecular surface as a dominating determinant for oral absorption and brain penetration of drugs. *Pharm. Res.* **16**, 1514-1519 (1999).
- Kelly S., et al. Glycogen synthase kinase 3beta inhibitor Chir025 reduces neuronal death resulting from oxygen-glucose deprivation, glutamate excitotoxicity, and cerebral ischemia. *Exp. Neurol.* **188**, 378-386 (2004).
- Kenworthy, K.E., Clarke, S.E., Andrews, J. & Houston, J.B. Multisite kinetic models for CYP3A4: simultaneous activation and inhibition of



- diazepam and testosterone metabolism. *Drug Metab. Dispos.* **29**, 1644-1651 (2001).
- Kharasch, E.D., Walker, A., Hoffer, C. & Sheffels, P. Intravenous and oral alfentanil as in vivo probes for hepatic and first-pass cytochrome P450 3A activity: noninvasive assessment by use of pupillary miosis. *Clin Pharmacol Ther* **76**, 452-466 (2004).
- Kieran, M. W. et al. Phase I study of SU5416, a small molecule inhibitor of the vascular endothelial growth factor receptor (VEGFR) in refractory pediatric central nervous system tumors. *Ped Blood Cancer* **52**, 169-176 (2009).
- Kim, E. J. et al. Dose-independent pharmacokinetics of a candidate for diabetic neuropathy, SR-4668, after intravenous and oral administration to rats: intestinal first-pass effect. *J. Pharm. Sci.* **92**, 1112-1124 (2003).
- Kim, R.B. et al. The drug transporter P-glycoprotein limits oral absorption and brain entry of HIV-1 protease inhibitors. *J Clin Invest* **101**, 289-294 (1998).
- Kitada, N. et al. Factors affecting sensitivity to antitumor platinum derivatives of human colorectal tumor cell lines. *Cancer Chemother Pharmacol* **62**, 577-584 (2008).
- Kivistö, K.T. et al. Characterisation of cerivastatin as a P-glycoprotein substrate: studies in P-glycoprotein-expressing cell monolayers and mdr1a/b knock-out mice. *Naunyn-Schmiedeberg's Arch Pharmacol* **370**, 124-130 (2004).
- Klotz, U. The role of pharmacogenetics in the metabolism of antiepileptic drugs: pharmacokinetic and therapeutic implications. *Clin. Pharmacokinet.* **46**, 271-279 (2007).
- Koh S. H., Yoo A. R., Chang D. I., Hwang S. J. & Seung H. Inhibition of GSK-3 reduces infarct volume and improves neurobehavioral functions. *Biochem. Biophys. Res. Comm.* **371**, 894-899 (2008).
- Kokubu K., Tani E., Nakano M., Minami N. & Shindo H. Effects of ML-9 on experimental delayed cerebral vasospasm. *J. Neurosurg.* **71**, 916-922 (1989).
- Kosaki, K. et al. A major influence of CYP2C19 genotype on the steady-state concentration of N-desmethylclobazam. *Brain Dev* **26**, 530-534 (2004).
- Kot, M. & Daniel, W.A. Effect of cytochrome P450 (CYP) inducers on caffeine metabolism in the rat. *Pharmacol Rep* **59**, 296-305 (2007).
- Kovarik, J.M. et al. Blood concentrations of everolimus are markedly increased by ketoconazole. *J. Clin. Pharmacol.* **45**, 514-518 (2005).
- Kozikowski, A. P. et al. Structure-based design leads to the identification of lithium mimetics that block mania-like effects in rodents. possible new GSK-3beta therapies for bipolar disorders. *J. Am. Chem. Soc.* **129**, 8328-8332 (2007).
- Krishna, R., Shah, V. & Srinivas, N. Pharmacokinetics and dose proportionality of BMS-204352 after intraarterial administration to rats. *Biopharm. Drug Dispos.* **23**, 233-237 (2002).
- Kudo, S., Umehara, K., Abe, Y., Furukawa, M. & Odomi, M. Intracerebral penetration of carteolol hydrochloride in rats. *Psychopharmacology* **131**, 388-393 (1997).
- Kuhn, J. G. et al. Pharmacokinetic and tumor distribution characteristics of temsirolimus in patients with recurrent malignant glioma. *Clin. Cancer Res.* **13**, 7401-7406 (2007).
- Kuhnholz, B., Wehner, H.D. & Bonte, W. [In vitro studies on the solubility of aliphatic alcohols in body tissues]. *Blutalkohol* **21**, 308-318 (1984).
- Kunsmann, G.W. & Rohrig, T.P. Tissue distribution of ibuprofen in a fatal overdose. *The American journal of forensic medicine and pathology* **14**, 48-50 (1993).
- Kusama, M., Maeda, K., Chiba, K., Aoyama, A. & Sugiyama, Y. Prediction of the effects of genetic polymorphism on the pharmacokinetics of CYP2C9 substrates from in vitro data. *Pharm. Res.* **26**, 822-835 (2009).
- Kusuhara, H., Suzuki, H., Terasaki, T. & Kakee, A. P-Glycoprotein mediates the efflux of quinidine across the blood-brain barrier. *J. Pharmacol. Exp. Ther.* **283**, 574-580 (1997).
- LaBella, F.S. & Queen, G. Subanesthetic concentrations of drugs inhibit cytochrome P450-mediated metabolism of aniline. *Eur. J. Pharmacol.* **293**, 231-235 (1995).
- Lagas, J.S., van der Kruijssen, C.M., van de Wetering, K., Beijnen, J.H. & Schinkel, A.H. Transport of diclofenac by breast Cancer Resistance protein (ABCG2) and stimulation of multidrug resistance protein 2 (ABCC2)-mediated drug transport by diclofenac and benzbromarone. *Drug Metab. Dispos.* **37**, 129-136 (2009).
- Laloo, A.K. et al. Membrane transport of camptothecin: facilitation by human P-glycoprotein (ABCB1) and multidrug resistance protein 2 (ABCC2). *BMC Med* **2**, 16 (2004).
- Langmead, C. et al. Characterization of a CNS penetrant, selective M1 muscarinic receptor agonist, 77-LH-28-1. *Br. J. Pharmacol.* **154**, 1104-1115 (2008).
- Lapka, R. Pharmacokinetics and brain entry of alaptide, a novel nootropic agent, in mice, rats and rabbits. *J Pharm Pharmacol* **43**, 874-876 (1991).
- Laugesen, S., Enggaard, T.P., Pedersen, R.S., Sindrup, S.H. & Brosten, K. Paroxetine, a cytochrome P450 2D6 inhibitor, diminishes the stereoselective O-demethylation and reduces the hypoalgesic effect of tramadol. *Clin Pharmacol Ther* **77**, 312-323 (2005).
- Laurenzana, E.M. & Owens, S.M. Metabolism of phencyclidine by human liver microsomes. *Drug Metab. Dispos.* **25**, 557-563 (1997).
- Lee, J., Son, J., Rhee, S. & Kim, D. Absorption, distribution, metabolism and excretion of telmesteine, a mucolytic agent, in rat. *TXEN* **33**, 755-765 (2003).
- Leggas, M. et al. Gefitinib modulates the function of multiple ATP-binding cassette transporters in vivo. *Cancer Res.* **66**, 4802-4807 (2006).
- Legos J. J., et al. SB 239063, a novel p38 inhibitor, attenuates early neuronal injury following ischemia. *Brain Res.* **892**, 70-77 (2001).
- Lemma, G.L. et al. The effect of short- and long-term administration of verapamil on the disposition of cytochrome P450 3A and P-glycoprotein substrates. *Clin Pharmacol Ther* **79**, 218-230 (2006).
- Lerman, C. et al. Nicotine metabolite ratio predicts efficacy of transdermal nicotine for smoking cessation. *Clin Pharmacol Ther* **79**, 600-8 (2006).
- Lewis, D.F., Ioannides, C. & Parke, D.V. A combined COMPACT and HazardExpert study of 40 chemicals for which information on mutagenicity and carcinogenicity is known, including the results of human epidemiological studies. *Hum Exp Toxicol* **17**, 577-86 (1998).
- Lewis, D.F. & Lake, B.G. Molecular modelling of CYP1A subfamily members based on an alignment with CYP102: rationalization of CYP1A substrate specificity in terms of active site amino acid residues. *Xenobiotica* **26**, 723-53 (1996).
- Lewis, D.F. et al. Homology modelling of human CYP2E1 based on the CYP2C5 crystal structure: investigation of enzyme-substrate and enzyme-inhibitor interactions. *Toxicol In Vitro* **17**, 93-105 (2003).
- Li, J., Zhao, M., He, P., Hidalgo, M. & Baker, S.D. Differential metabolism of gefitinib and erlotinib by human cytochrome P450 enzymes. *Clin Cancer Res.* **13**, 3731-7 (2007).
- Lin, J.H. Role of pharmacokinetics in the discovery and development of indinavir. *Adv Drug Deliv Rev* **39**, 33-49 (1999).
- Liu D. Z., et al. Src kinase inhibition decreases thrombin-induced injury and cell cycle re-entry in striatal neurons. *Neurobiol. Dis.* **30**, 201-211 (2008).

- Liu S. J., *et al.* Overactivation of glycogen synthase kinase-3 by inhibition of phosphoinositol-3 kinase and protein kinase C leads to hyperphosphorylation of tau and impairment of spatial memory. *J. Neurochem.* **87**, 1333-1344 (2003).
- Liverton, N.J. *et al.* Design and synthesis of potent, selective, and orally bioavailable tetrasubstituted imidazole inhibitors of p38 mitogen-activated protein kinase. *J. Med. Chem.* **42**, 2180-2190 (1999).
- Lorenc-Koci, E. Disposition of 1,2,3,4,-tetrahydroisoquinoline in the brain of male Wistar and Dark Agouti rats. *Brain Research* **996**, 168-179 (2004).
- Lourenco, C.M., Houle, S., Wilson, A.A. & DaSilva, J.N. Characterization of r-(11)C]rolipram for PET imaging of phosphodiesterase-4: in vitro binding, metabolism, and dosimetry studies in rats. *Nucl Med Biol* **28**, 347-358 (2001).
- Lu, L. *et al.* The enantioselective binding of mefloquine enantiomers to P-glycoprotein determined using an immobilized P-glycoprotein liquid chromatographic stationary phase. *Pharm. Res.* **18**, 1327-1330 (2001).
- Luna-Medina, R., *et al.* NP031112, a thiadiazolidinone compound, prevents inflammation and neurodegeneration under excitotoxic conditions: potential therapeutic role in brain disorders. *J. Neurosci.* **27**, 5766-5776 (2007).
- Madsen, H., Enggaard, T.P., Hansen, L.L., Klitgaard, N.A. & Brosen, K. Fluvoxamine inhibits the CYP2C9 catalyzed biotransformation of tolbutamide. *Clin Pharmacol Ther* **69**, 41-7 (2001).
- Maemoto, T. *et al.* Pharmacological characterization of FR194921, a new potent, selective, and orally active antagonist for central adenosine A1 receptors. *J Pharmacol Sci* **96**, 42-52 (2004).
- Mahar Doan, K.M. *et al.* Passive permeability and P-glycoprotein-mediated efflux differentiate central nervous system (CNS) and non-CNS marketed drugs. *J. Pharmacol. Exp. Ther.* **303**, 1029-1037 (2002).
- Mahar Doan, K.M. *et al.* Steady-state brain concentrations of antihistamines in rats: interplay of membrane permeability, P-glycoprotein efflux and plasma protein binding. *Pharmacology* **72**, 92-98 (2004).
- Mahju, M.A. & Maickel, R.P. Accumulation of phenothiazine tranquilizers in rat brain and plasma after repeated dosage. *Biochem. Pharmacol.* **18**, 2701-2710 (1969).
- Mahnir, V., Lin, B., Prokai-Tatrai, K. & Kem, W.R. Pharmacokinetics and urinary excretion of DMXBA (GTS-21), a compound enhancing cognition. *Biopharm. Drug Dispos.* **19**, 147-151 (1998).
- Mandema, J.W., Kuck, M.T. & Danhof, M. Differences in intrinsic efficacy of benzodiazepines are reflected in their concentration-EEG effect relationship. *Br. J. Pharmacol.* **105**, 164-170 (1992).
- Mandlekar, S.V. *et al.* Development of an in vivo rat screen model to predict pharmacokinetic interactions of CYP3A4 substrates. *Xenobiotica* **37**, 923-942 (2007).
- Marre, F. *et al.* Involvement of the cytochrome P-450IID subfamily in minaprine 4-hydroxylation by human hepatic microsomes. *Drug Metab. Dispos.* **20**, 316-321 (1992).
- Matsui, K., Mishima, M., Nagai, Y., Yuzuriha, T. & Yoshimura, T. Absorption, distribution, metabolism, and excretion of donepezil (Aricept) after a single oral administration to Rat. *Drug Metab. Dispos.* **27**, 1406-1414 (1999).
- McClue, S.J. & Stuart, I. Metabolism of the trisubstituted purine cyclin-dependent kinase inhibitor seliciclib (R-roscovitine) in vitro and in vivo. *Drug Metab. Dispos.* **36**, 561-570 (2008).
- McCullough L. D., *et al.* Pharmacological inhibition of AMP-activated protein kinase provides neuroprotection in stroke. *J. Biol. Chem.* **280**, 20493-20502 (2005).
- McEnroe, J.D. & Fleishaker, J.C. Clinical pharmacokinetics of almotriptan, a serotonin 5-HT(1B/1D) receptor agonist for the treatment of migraine. *Clin. Pharmacokinet.* **44**, 237-246 (2005).
- McGinnity, D.F., Parker, A.J., Soars, M. & Riley, R.J. Automated definition of the enzymology of drug oxidation by the major human drug metabolizing cytochrome P450s. *Drug Metab. Dispos.* **28**, 1327-1334 (2000).
- Meikle L., *et al.* Response of a neuronal model of tuberous sclerosis to mammalian target of rapamycin (mTOR) inhibitors: effects on mTORC1 and Akt signaling lead to improved survival and function. *J. Neurosci.* **28**, 5422-5432 (2008).
- Meulenberg, C. Empirical Relations Predicting Human and Rat Tissue:Air Partition Coefficients of Volatile Organic Compounds. *Toxicology and Applied Pharmacology* **165**, 206-216 (2000).
- Mikus, G. *et al.* Potent cytochrome P450 2C19 genotype-related interaction between voriconazole and the cytochrome P450 3A4 inhibitor ritonavir. *Clin Pharmacol Ther* **80**, 126-135 (2006).
- Milane, A. *et al.* Mincocycline and riluzole brain disposition: interactions with p-glycoprotein at the blood-brain barrier. *J Neurochem* **103**, 164-173 (2007).
- Minami, H. *et al.* Phase I and pharmacokinetic study of sorafenib, an oral multikinase inhibitor, in Japanese patients with advanced refractory solid tumors. *Cancer Sci* **99**, 1492-1498 (2008).
- Minami N., Tani E., Maeda Y., Yamaura I. & Fukami M. Effects of inhibitors of protein kinase C and calpain in experimental delayed cerebral vasospasm. *J. Neurosurg.* **76**, 111-118 (1992).
- Minthorn, E. *et al.* Pharmacokinetics and brain penetration of casopitant, a potent and selective neurokinin-1 receptor antagonist, in the ferret. *Drug Metab. Dispos.* **36**, 1846-1852 (2008).
- Miura, M. & Ohkubo, T. Identification of human cytochrome P450 enzymes involved in the major metabolic pathway of fluvoxamine. *Xenobiotica* **37**, 169-179 (2007).
- Miyagi, N. *et al.* Effect of concanavalin A on the aspirin concentration and distribution in the brain and plasma of rats. *Journal of pharmacobio-dynamics* **9**, 704-714(1986).
- Miyama, T. *et al.* P-glycoprotein-mediated transport of itraconazole across the blood-brain barrier. *Antimicrob Agents Chemother* **42**, 1738-1744 (1998).
- Moerlein, S.M., Laufer, P. & Stocklin, G. Effect of lipophilicity on the in vivo localization of radiolabelled spiperone analogues. *Int J Nucl Med Biol* **12**, 353-356 (1985).
- Molden, E., Garcia, B.H., Braathen, P. & Eggen, A.E. Co-prescription of cytochrome P450 2D6/3A4 inhibitor-substrate pairs in clinical practice. A retrospective analysis of data from Norwegian primary pharmacies. *Eur J. Clin. Pharmacol.* **61**, 119-125 (2005).
- Moody, G.C., Griffin, S.J., Mather, A.N., McGinnity, D.F. & Riley, R.J. Fully automated analysis of activities catalysed by the major human liver cytochrome P450 (CYP) enzymes: assessment of human CYP inhibition potential. *Xenobiotica* **29**, 53-75 (1999).
- Morello, K.C., Wurz, G.T. & DeGregorio, M.W. Pharmacokinetics of selective estrogen receptor modulators. *Clin Pharmacokin* **42**, 361-372 (2003).
- Mori T., *et al.* Mitogen-activated protein kinase inhibition in traumatic brain injury: in vitro and in vivo effects. *J. Cereb. Blood Flow. Metab.* **22**, 444-452 (2002).
- Moriki, Y. *et al.* In vivo evidence for the efflux transport of pentazocine from the brain across the blood-brain barrier using the brain efflux index method. *J Drug Target* **13**, 53-59 (2005).
- Morimoto, K. *et al.* Oseltamivir (Tamiflu) efflux transport at the blood-brain barrier via P-glycoprotein. *Drug Metab. Dispos.* **36**, 6-9 (2008).

- Morishima, H.O., Okutomi, T., Ishizaki, A., Zhang, Y. & Cooper, T.B. The disposition of benzoylecgonine in maternal and fetal rats. *Neurotoxicology and teratology* **23**, 247-253 (2001).
- Muck, W. Clinical pharmacokinetics of cerivastatin. *Clin. Pharmacokinet.* **39**, 99-116 (2000).
- Mukaiyama, H. *et al.* Novel pyrazolo[1,5-a]pyrimidines as c-Src kinase inhibitors that reduce IKr channel blockade. *Bioorg. Med. Chem.* **16**, 909-921 (2008).
- Mukaiyama, H. *et al.* Synthesis and c-Src inhibitory activity of imidazo[1,5-a]pyrazine derivatives as an agent for treatment of acute ischemic stroke. *Bioorg. Med. Chem.* **15**, 868-885 (2007).
- Munoz, L. *et al.* A novel p38 $\alpha$  MAPK inhibitor suppresses brain proinflammatory cytokine up-regulation and attenuates synaptic dysfunction and behavioral deficits in an Alzheimer's disease mouse model. *J Neuroinflammation* **4**, 21 (2007).
- Muñoz-Montañó J. R., Moreno F. J., Avila J. & Diaz-Nido J. Lithium inhibits Alzheimer's disease-like tau protein phosphorylation in neurons. *FEBS Lett.* **411**, 183-188 (1997).
- Nakajima, M. *et al.* Cytochrome P450 2C9 catalyzes indomethacin O-demethylation in human liver microsomes. *Drug Metab. Dispos.* **26**, 261-266 (1998).
- Nakazono, T., Murakami, T., Higashi, Y. & Yata, N. Study on brain uptake of local anesthetics in rats. *Journal of pharmacobio-dynamics* **14**, 605-613 (1991).
- Nath N., *et al.* 5-aminoimidazole-4- $\beta$ -carboxamide ribonucleoside: a novel immunomodulator with therapeutic efficacy in experimental autoimmune encephalomyelitis. *J. Immunol.* **175**, 566-574 (2005).
- Neil-Dwyer, G., Bartlett, J., McAinsh, J. & Cruickshank, J.M. Beta-adrenoceptor blockers and the blood-brain barrier. *Br J. Clin. Pharmacol.* **11**, 549-553 (1981).
- Nelson, J.A., Cserr, H.F. & Chu, S.H. Distribution of 6-mercaptopurine ribonucleoside and other purine analogs to brain. *Cancer Res.* **34**, 1889-1891 (1974).
- Neuvonen, P.J., Backman, J.T. & Niemi, M. Pharmacokinetic comparison of the potential over-the-counter statins simvastatin, lovastatin, fluvastatin and pravastatin. *Clin. Pharmacokinet.* **47**, 463-474 (2008).
- Nicolazzo, J.A. *et al.* Pharmacokinetics and brain uptake of AM-36, a novel neuroprotective agent, following intravenous administration to rats. *J Pharm Pharmacol* **60**, 171-178 (2008).
- Niemi, M. *et al.* Itraconazole, gemfibrozil and their combination markedly raise the plasma concentrations of loperamide. *Eur J. Clin. Pharmacol.* **62**, 463-472 (2006).
- Nishimori, T. *et al.* [Effects of cadralazine on the central nervous system]. *Nippon Yakurigaku Zasshi* **91**, 209-220 (1988).
- Nishizawa S., Obara K., Koide M., Nakayama K., Ohta S. & Yokoyama T. Attenuation of canine cerebral vasospasm after subarachnoid hemorrhage by protein kinase C inhibitors despite augmented phosphorylation of myosin light chain. *J. Vasc. Res.* **40**, 169-178 (2003).
- Niwa, T., Inoue, S., Shiraga, T. & Takagi, A. No inhibition of cytochrome P450 activities in human liver microsomes by sulpiride, an antipsychotic drug. *Biol Pharm Bull* **28**, 188-91 (2005).
- Noker, P.E., Hill, D.L., Kalin, J.R., Temple, C.G. & Montgomery, J.A. Pharmacokinetic and metabolism studies of two novel 1-deaza-7,8-dihydropteridines in mice. *Drug Metab. Dispos.* **13**, 677-681 (1985).
- Obach, R.S. & Reed-Hagen, A.E. Measurement of Michaelis constants for cytochrome P450-mediated biotransformation reactions using a substrate depletion approach. *Drug Metab. Dispos.* **30**, 831-837 (2002).
- Obradovic, T., Dobson, G., Shingaki, T., Kungu, T. & Hidalgo, I. Assessment of the first and second generation antihistamines brain penetration and role of P-glycoprotein. *Pharm. Res.* **24**, 318-327 (2007).
- Ohta, Y., Ar, A. & Farhi, L.E. Solubility and partition coefficients for gases in rabbit brain and blood. *Journal of applied physiology* **46**, 1169-1170 (1979).
- Ohyama, K. *et al.* Inhibitory effects of amiodarone and its N-deethylated metabolite on human cytochrome P450 activities: prediction of in vivo drug interactions. *Br J. Clin. Pharmacol.* **49**, 244-253 (2000).
- Okuyama, S. *et al.* The mode of action of analgesic drugs in adjuvant arthritic rats as an experimental model of chronic inflammatory pain. *Japan J Pharmacol* **35**, 95-103 (1984).
- Oldendorf, W.H., Hyman, S., Braun, L. & Oldendorf, S.Z. Blood-brain barrier: penetration of morphine, codeine, heroin, and methadone after carotid injection. *Science* **178**, 984-986 (1972).
- Olesen, O.V. & Linnet, K. Studies on the stereoselective metabolism of citalopram by human liver microsomes and cDNA-expressed cytochrome P450 enzymes. *Pharmacology* **59**, 298-309 (1999).
- Olkkola, K.T. & Ahonen, J. Midazolam and other benzodiazepines. *Handb Exp Pharmacol*, 335-360 (2008).
- Omuro, A. Exploring multi-targeting strategies for the treatment of gliomas. *Curr Opin Investig Drugs* **9**, 1287-1295 (2008).
- Ooms, F., Weber, P., Carrupt, P.A. & Testa, B. A simple model to predict blood-brain barrier permeation from 3D molecular fields. *BBA-Molecular Basis of Disease* **1587**, 118-125 (2002).
- Oostendorp, R.L., Marchetti, S., Beijnen, J.H., Mazzanti, R. & Schellens, J.H. The effect of hydroxyurea on P-glycoprotein/BCRP-mediated transport and CYP3A metabolism of imatinib mesylate. *Cancer Chemother Pharmacol* **59**, 855-860 (2007).
- Orlando, R. *et al.* Cytochrome P450 1A2 is a major determinant of lidocaine metabolism in vivo: effects of liver function. *Clin Pharmacol Ther* **75**, 80-88 (2004).
- Ose, A. *et al.* Limited brain distribution of [3R,4R,5S]-4-acetamido-5-amino-3-(1-ethylpropoxy)-1-cyclohexene-1-carboxylate phosphate (Ro 64-0802), a pharmacologically active form of Oseltamivir, by active efflux across the blood-brain barrier mediated by organic anion transporter 3 (Oat3/Slc22a8) and multidrug resistance-associated protein 4 (Mrp4/Abcc4). *Drug Metab. Dispos.* **37**, 315-321 (2008).
- Oumata N., *et al.* Roscovitine-derived, dual-specificity inhibitors of cyclin-dependent kinases and casein kinases I. *J. Med. Chem.* **51**, 5229-5242 (2008).
- Otuki M. F., *et al.* Antinociceptive properties of mixture of alpha-amyrin and beta-amyrin triterpenes: evidence for participation of protein kinase C and protein kinase A pathways. *J. Pharmacol. Exp. Ther.* **313**, 310-318 (2005).
- Pan, D., Iyer, M., Liu, J., Li, Y. & Hopfinger, A.J. Constructing optimum blood brain barrier QSAR models using a combination of 4D-molecular similarity measures and cluster analysis. *J Chem Inf Comput Sci* **44**, 2083-2098 (2004).
- Pan, G., Giri, N. & Elmquist, W.F. Abcg2/Bcrp1 mediates the polarized transport of antiretroviral nucleosides abacavir and zidovudine. *Drug Metab. Dispos.* **35**, 1165-1173 (2007).
- Park, J.E. *et al.* Contribution of cytochrome P450 3A4 and 3A5 to the metabolism of atorvastatin. *Xenobiotica* **38**, 1240-1251 (2008).
- Parkinson Study Group. Mixed lineage kinase inhibitor CEP-1347 fails to delay disability in early Parkinson disease. *Neurology* **69**, 1480-1490 (2007).
- Parnham M. & Sies H. Ebselen: prospective therapy for cerebral ischaemia. *Exp. Opin. Investig. Drugs* **9**, 607-619 (2000).

- Pellinen, P. *et al.* Cocaine N-demethylation and the metabolism-related hepatotoxicity can be prevented by cytochrome P450 3A inhibitors. *Eur. J. Pharmacol.* **270**, 35-43 (1994).
- Perbellini, L., Brugnone, F., Caretta, D. & Maranelli, G. Partition coefficients of some industrial aliphatic hydrocarbons (C5-C7) in blood and human tissues. *Br J Ind Med* **42**, 162-167 (1985).
- Perucca, E. Clinical pharmacokinetics of new-generation antiepileptic drugs at the extremes of age. *Clin. Pharmacokinet.* **45**, 351-363 (2006).
- Phelan, D.G., Greig, N.H., Rapoport, S.I. & Soncrant, T.T. High-performance liquid chromatographic assay of bromocriptine in rat plasma and brain. *J Chromatogr* **533**, 264-270 (1990).
- Piao C. S., Kim J. B., Han P. L. & Lee J. K. Administration of the p38 MAPK inhibitor SB203580 affords brain protection with a wide therapeutic window against focal ischemic insult. *J. Neurosci. Res.* **73**, 537-544 (2003).
- Pichard, L. *et al.* Oxidative metabolism of zolpidem by human liver cytochrome P450S. *Drug Metab. Dispos.* **23**, 1253-1262 (1995).
- Pirvola, U., *et al.* Rescue of hearing, auditory hair cells, and neurons by CEP-1347/KT7515, an inhibitor of c-Jun N-terminal kinase activation. *J. Neurosci.* **20**, 43-50 (2000).
- Polli, J. *et al.* An unexpected synergist role of P-glycoprotein and breast cancer resistance protein on the central nervous system penetration of the tyrosine kinase inhibitor lapatinib (N-{3-chloro-4-[(3-fluorobenzyl)oxy]phenyl}-6-[5-({[2-(methylsulfonyl)ethyl]amino)methyl}-2-furyl]-4-quinazolinamine; GW572016). *Drug Metab. Dispos.* **37**, 439-442 (2009).
- Poulin, P. & Theil, F.P. A priori prediction of tissue:plasma partition coefficients of drugs to facilitate the use of physiologically-based pharmacokinetic models in drug discovery. *J. Pharm. Sci.* **89**, 16-35 (2000).
- Porkka, K. *et al.* Dasatinib crosses the blood-brain barrier and is an efficient therapy for central nervous system Philadelphia chromosome-positive leukemia. *Blood* **112**, 1005-1012 (2008).
- Preusser, M. *et al.* Epithelial growth factor receptor inhibitors for treatment of recurrent or progressive high grade glioma: an exploratory study. *J. Neurooncol.* **89**, 211-218 (2008).
- Procopiou, P.A. *et al.* 4-acyl-1-(4-aminoalkoxyphenyl)-2-ketopiperazines as a novel class of non-brain-penetrant histamine H3 receptor antagonists. *J. Med. Chem.* **50**, 6706-6717 (2007).
- Proksch, J.W., Gentry, W.B. & Owens, S.M. Anti-phencyclidine monoclonal antibodies provide long-term reductions in brain phencyclidine concentrations during chronic phencyclidine administration in rats. *J. Pharmacol. Exp. Ther.* **292**, 831-837 (2000).
- Qi X, Ackermann C, Sun D, Liu R, Sheng M, Hou H. The prediction of plasma and brain levels of 2,3,5,6-tetramethylpyrazine following transdermal application. *AAPS PharmSci* **4**, E46 (2002).
- Raghavan, N., Zhang, D., Zhu, M., Zeng, J. & Christopher, L. Cyp2D6 catalyzes 5-hydroxylation of 1-(2-pyrimidinyl)-piperazine, an active metabolite of several psychoactive drugs, in human liver microsomes. *Drug Metab. Dispos.* **33**, 203-208 (2005).
- Ralay Ranaivo, H. *et al.* Glia as a therapeutic target: selective suppression of human amyloid-beta-induced upregulation of brain proinflammatory cytokine production attenuates neurodegeneration. *J Neurosci* **26**, 662-670 (2006).
- Ramirez, J. *et al.* In vitro characterization of hepatic flavopiridol metabolism using human liver microsomes and recombinant UGT enzymes. *Pharm. Res.* **19**, 588-594 (2002).
- Ramzan, I.M. & Levy, G. Chronic theophylline administration has no apparent effect on theophylline concentrations required to produce seizures in rats. *Proc Soc Exp Biol Med* **182**, 176-180 (1986).
- Ravikumar, B., *et al.* Inhibition of mTOR induces autophagy and reduces toxicity of polyglutamine expansions in fly and mouse models of Huntington disease. *Nat. Genet.* **36**, 585-595 (2004).
- Raymond, E. *et al.* Phase II study of imatinib in patients with recurrent gliomas of various histologies: a European Organisation for Research and Treatment of Cancer Brain Tumor Group Study. *J. Clin. Oncol.* **26**, 4659-4665 (2008).
- Reavill, C. *et al.* Pharmacological actions of a novel, high-affinity, and selective human dopamine D3 receptor antagonist, SB-277011-A. *J. Pharmacol. Exp. Ther.* **294**, 1154-1165 (2000).
- Regev, R., Katzir, H., Yeheskely-Hayon, D. & Eytan, G.D. Modulation of P-glycoprotein-mediated multidrug resistance by acceleration of passive drug permeation across the plasma membrane. *Febs J* **274**, 6204-6214 (2007).
- Reyderman, L. *et al.* Disposition and pharmacokinetics of temozolomide in rat. *Xenobiotica* **34**, 487-500 (2004).
- Riley, R.J., Parker, A.J., Trigg, S. & Manners, C.N. Development of a generalized, quantitative physicochemical model of CYP3A4 inhibition for use in early drug discovery. *Pharm. Res.* **18**, 652-655 (2001).
- Riviere, G.J., Gentry, W.B. & Owens, S.M. Disposition of methamphetamine and its metabolite amphetamine in brain and other tissues in rats after intravenous administration. *J. Pharmacol. Exp. Ther.* **292**, 1042-1047 (2000).
- Rochat, B., Baumann, P. & Audus, K.L. Transport mechanisms for the antidepressant citalopram in brain microvessel endothelium. *Brain Res* **831**, 229-236 (1999).
- Rodrigues, A.D. *et al.* Is celecoxib an inducer of cytochrome P450 3A4 in subjects carrying the CYP2C9\*3 allele? *Clin Pharmacol Ther* **80**, 298-301 (2006).
- Roeloffs, R., Wickenden, A.D., Crean, C. & Werness, S. In vivo profile of ICA-27243 [N-(6-Chloro-pyridin-3-yl)-3, 4-difluoro-benzamide], a potent and selective KCNQ2/Q3 (Kv7.2/Kv7.3) activator in rodent anticonvulsant models. *J. Pharmacol. Exp. Ther.* **326**, 818-828 (2008).
- Rosa A. O., *et al.* Antidepressant-like effect of the novel thiazolidinone NP031115 in mice. *Prog. Neuropsychopharm. Biol. Psych.* **32**, 1549-1556 (2008).
- Rose, K., Hall, L.H. & Kier, L.B. Modeling blood-brain barrier partitioning using the electrotopological state. *J Chem Inf Comput Sci* **42**, 651-666 (2002).
- Rupniak, N.M. *et al.* Comparison of the functional blockade of rat substance P (NK1) receptors by GR205171, RP67580, SR140333 and NKP-608. *Neuropharmacology* **45**, 231-241 (2003).
- Saitoh, H. & Aungst, B.J. Possible involvement of multiple P-glycoprotein-mediated efflux systems in the transport of verapamil and other organic cations across rat intestine. *Pharm. Res.* **12**, 1304-1310 (1995).
- Sallam, H. *et al.* Age-dependent pharmacokinetics and effect of roscovitine on Cdk5 and Erk1/2 in the rat brain. *Pharmacol Res* **58**, 32-37 (2008).
- Salminen, T., Pulli, A. & Taskinen, J. Relationship between immobilised artificial membrane chromatographic retention and the brain penetration of structurally diverse drugs. *J Pharm Biomed Anal* **15**, 469-477 (1997).
- Sanderink, G.J., Bournique, B., Stevens, J., Petry, M. & Martinet, M. Involvement of human CYP1A isoenzymes in the metabolism and drug interactions of riluzole in vitro. *J. Pharmacol. Exp. Ther.* **282**, 1465-1472 (1997).
- Saporito, M.S., Hudkins, R. L. & Maroney, A. C. Discovery of CEP-1347/KT-7515, an inhibitor of the JNK/SAPK pathway for the treatment of neurodegenerative diseases. *Prog. Med. Chem.* **40**, 23-62 (2002).
- Sarau, H.M. *et al.* Nonpeptide tachykinin receptor antagonists. II. Pharmacological and pharmacokinetic profile of SB-222200, a central nervous system penetrant, potent and selective NK-3 receptor antagonist. *J. Pharmacol. Exp. Ther.* **295**, 373-381 (2000).
- Saruwatari, J. *et al.* Impact of CYP2D6\*10 on H1-antihistamine-induced hypersomnia. *Eur J. Clin. Pharmacol.* **62**, 995-1001 (2006).

- Sarver, J.G., Bachmann, K.A., Zhu, D. & Klis, W.A. Ethosuximide is primarily metabolized by CYP3A when incubated with isolated rat liver microsomes. *Drug Metab. Dispos.* **26**, 78-82 (1998).
- Satoh, S., Utsunomiya, T., Tsurui, K., Kobayashi, T., Ikegaki, I., Sasaki, Y., Asano, T. Pharmacological profile of hydroxy fasudil as a selective rho kinase inhibitor on ischemic brain damage. *Life Sci.* **69**, 1441-1453 (2001).
- Satoh, S., Toshima, Y., Ikegaki, I., Iwasaki, M. & Asano, T. Wide therapeutic time window for fasudil neuroprotection against ischemia-induced delayed neuronal death in gerbils. *Brain Res.* **1128**, 175-180 (2007).
- Sauer, C., Peters, F.T., Schwaninger, A.E., Meyer, M.R. & Maurer, H.H. Investigations on the cytochrome P450 (CYP) isoenzymes involved in the metabolism of the designer drugs N-(1-phenyl cyclohexyl)-2-ethoxyethanamine and N-(1-phenylcyclohexyl)-2-methoxyethanamine. *Biochem. Pharmacol.* **77**, 444-450 (2009).
- Scavone, J.M., Friedman, H., Greenblatt, D.J. & Shader, R.I. Effect of age, body composition, and lipid solubility on benzodiazepine tissue distribution in rats. *Arzneimittelforschung* **37**, 2-6 (1987).
- Schinkel, A.H., Wagenaar, E., van Deemter, L., Mol, C.A. & Borst, P. Absence of the mdr1a P-Glycoprotein in mice affects tissue distribution and pharmacokinetics of dexamethasone, digoxin, and cyclosporin A. *J Clin Invest* **96**, 1698-1705 (1995).
- Schmalzing, G. Metabolism and disposition of trifluoperazine in the rat. II. Kinetics after oral and intravenous administration in acutely and chronically treated animals. *Drug Metab. Dispos.* **5**, 104-115 (1977).
- Schmider, J., Greenblatt, D.J., von Moltke, L.L., Karsov, D. & Shader, R.I. Inhibition of CYP2C9 by selective serotonin reuptake inhibitors in vitro: studies of phenytoin p-hydroxylation. *Br J. Clin. Pharmacol.* **44**, 495-498 (1997).
- Schwarz, T. *et al.* Pharmacokinetics of repinotan in healthy and brain injured animals. *Biopharm Drug Dispos* **26**, 259-268 (2005).
- Scott-Stevens, P., Atack, J.R., Sohal, B. & Worboys, P. Rodent pharmacokinetics and receptor occupancy of the GABAA receptor subtype selective benzodiazepine site ligand L-838417. *Biopharm. Drug Dispos.* **26**, 13-20 (2005).
- Selenica M. L., *et al.* Efficacy of small-molecule glycogen synthase kinase-3 inhibitors in the postnatal rat model of tau hyperphosphorylation. *Br. J. Pharmacol.* **152**, 959-979 (2007).
- Sellers, E.M. & Tyndale, R.F. Mimicking gene defects to treat drug dependence. *Ann N Y Acad Sci* **909**, 233-246 (2000).
- Senderowicz A. M. Inhibitors of cyclin-dependent kinase modulators for cancer therapy. *Prog. Drug. Res.* **63**, 183-206 (2005).
- Sereno, L., *et al.* A novel GSK-3beta inhibitor reduces Alzheimer's pathology and rescues neuronal loss in vivo. *Neurobiol. Dis.* In press. (2009).
- Shamloo M., Soriano L., Wieloch T., Nikolich K., Urfer R. & Oksenberg D. Death-associated protein kinase is activated by dephosphorylation in response to cerebral ischemia. *J. Biol. Chem.* **280**, 42290-42299 (2005).
- Shams, M.E. *et al.* CYP2D6 polymorphism and clinical effect of the antidepressant venlafaxine. *J. Clin. Pharm. Ther.* **31**, 493-502 (2006).
- Shapira M., *et al.* Role of glycogen synthase kinase-3beta in early depressive behavior induced by mild traumatic brain injury. *Mol. Cell. Neurosci.* **34**, 571-577 (2007).
- Shen, J., Cross, S.T., Tang-Liu, D.D. & Welty, D.F. Evaluation of an immortalized retinal endothelial cell line as an in vitro model for drug transport studies across the blood-retinal barrier. *Pharm. Res.* **20**, 1357-1363 (2003).
- Shi, Z. *et al.* Erlotinib (Tarceva, OSI-774) antagonizes ATP-binding cassette subfamily B member 1 and ATP-binding cassette subfamily G member 2-mediated drug resistance. *Cancer Res.* **67**, 11012-11020 (2007).
- Shibuya M., Hirai S., Seto M., Satoh S. & Ohtomo E. Effects of fasudil in acute ischemic stroke: results of a prospective placebo-controlled double-blind trial. *J. Neurol. Sci.* **238**, 31-39 (2005).
- Shih, C.L., Chen, H.H. & Chiu, T.H. Acute exposure to trichloroethylene differentially alters the susceptibility to chemoconvulsants in mice. *Toxicology* **162**, 35-42 (2001).
- Shin H. K., *et al.* Rho-kinase inhibition acutely augments blood flow in focal cerebral ischemia via endothelial mechanisms. *J. Cereb. Blood Flow. Metab.* **27**, 998-1009 (2007).
- Sills, G. & Brodie, M. Pharmacokinetics and drug interactions with zonisamide. *Epilepsia* **48**, 435-441 (2007).
- Singh, S.B., Shen, L.Q., Walker, M.J. & Sheridan, R.P. A model for predicting likely sites of CYP3A4-mediated metabolism on drug-like molecules. *J. Med. Chem.* **46**, 1330-1336 (2003).
- Sloan, B. & Scheinfeld, N. S. Pazopanib, a VEGF receptor tyrosine kinase inhibitor for cancer therapy. *Curr Opin Investig Drugs* **9**, 1324-1335 (2008).
- Smith F. L., Javed R. R., Smith P. A., Dewey W. L. & Gabra B. H. PKC and PKA inhibitors reinstate morphine-induced behaviors in morphine tolerant mice. *Pharmacol. Res.* **54**, 474-480 (2006).
- Somogyi, A.A., Menelaou, A. & Fullston, S.V. CYP3A4 mediates dextropropoxyphene N-demethylation to nordextropropoxyphene: human in vitro and in vivo studies and lack of CYP2D6 involvement. *Xenobiotica* **34**, 875-887 (2004).
- Soyama, A. *et al.* Amiodarone N-deethylation by CYP2C8 and its variants, CYP2C8\*3 and CYP2C8 P404A. *Pharmacol. Toxicol.* **91**, 174-178 (2002).
- Spina, E. & de Leon, J. Metabolic drug interactions with newer antipsychotics: a comparative review. *Basic Clin Pharmacol. Toxicol.* **100**, 4-22 (2007).
- Stähle, L. & Oberg, B. Pharmacokinetics and distribution over the blood brain barrier of two acyclic guanosine analogs in rats, studied by microdialysis. *Antimicrob. Agents Chemother.* **36**, 339-342 (1992).
- Stean, T.O. *et al.* Pharmacological profile of SB-357134: a potent, selective, brain penetrant, and orally active 5-HT(6) receptor antagonist. *Pharmacol Biochem Behav* **71**, 645-654 (2002).
- Stirling D. P. Liu J., Plunet W., Steeves J. D. & Tetzlaff W. SB203580, a p38 mitogen-activated protein kinase inhibitor, fails to improve functional outcome following a moderate spinal cord injury in rat. *Neuroscience* **155**, 128-137 (2008).
- Storch, C.H., Theile, D., Lindenmaier, H., Haefeli, W.E. & Weiss, J. Comparison of the inhibitory activity of anti-HIV drugs on P-glycoprotein. *Biochem. Pharmacol.* **73**, 1573-1581 (2007).
- Stormer, E., von Moltke, L.L., Shader, R.I. & Greenblatt, D.J. Metabolism of the antidepressant mirtazapine in vitro: contribution of cytochromes P-450 1A2, 2D6, and 3A4. *Drug Metab. Dispos.* **28**, 1168-1175 (2000).
- Su Y., Ryder J. & Ni B. Inhibition of Abeta production and APP maturation by a specific PKA inhibitor. *FEBS. Lett.* **546**, 407-410 (2003).
- Subramanian, G. & Kitchen, D.B. Computational models to predict blood-brain barrier permeation and CNS activity. *J Comput Aided Mol Des* **17**, 643-664 (2003).
- Sun X., *et al.* The selective Rho-kinase inhibitor Fasudil is protective and therapeutic in experimental autoimmune encephalomyelitis. *J. Neuroinflamm.* **180**, 126-134 (2006).
- Swaisland, H.C., Cantarini, M.V., Fuhr, R. & Holt, A. Exploring the relationship between expression of cytochrome P450 enzymes and gefitinib pharmacokinetics. *Clin. Pharmacokinet.* **45**, 633-644 (2006).
- Takle, A.K. *et al.* The identification of potent, selective and CNS penetrant furan-based inhibitors of B-Raf kinase. *Bioorg. Med. Chem. Lett.* **18**, 4373-4376 (2008).
- Tanaka, E., Kurata, N. & Yasuhara, H. Involvement of cytochrome P450 2C9, 2E1 and 3A4 in trimethadione N-demethylation in human

- microsomes. *J. Clin. Pharm. Ther.* **28**, 493-496 (2003).
- Teicher B. A., *et al.* Enzymatic rationale and preclinical support for a potent protein kinase C beta inhibitor in cancer therapy. *Adv. Enzyme. Regul.* **39**, 313-327 (1999).
- Thomas, D.R. *et al.* SB-656104-A, a novel selective 5-HT7 receptor antagonist, modulates REM sleep in rats. *Br. J. Pharmacol.* **139**, 705-714 (2003).
- Thotala D. K., Hallahan D. E. & Yazlovitskaya E. M. Inhibition of glycogen synthase kinase 3 beta attenuates neurocognitive dysfunction resulting from cranial irradiation. *Cancer Res.* **68**, 5859-5868 (2008).
- Tibbs R., *et al.* Effects of mitogen-activated protein kinase inhibitors on cerebral vasospasm in a double-hemorrhage model in dogs. *J. Neurosurg.* **93**, 1041-1047 (2000).
- Timmermann, D.B. *et al.* An allosteric modulator of the alpha7 nicotinic acetylcholine receptor possessing cognition-enhancing properties in vivo. *J. Pharmacol. Exp. Ther.* **323**, 294-307 (2007).
- Tokuyama S., Ho I. K. & Yamamoto T. A protein kinase inhibitor, H-7, blocks naloxone-precipitated changes in dopamine and its metabolites in the brains of opioid-dependent rats. *Brain Res. Bull.* **52**, 363-369 (2000).
- Tomsig, J. L., Gruenstein, E. & Dimlich, R. V. Inhibition of lactate-induced swelling by dichloroacetate in human astrocytoma cells. *Brain Res.* **568**, 92-100 (1991).
- Tran, J.Q., Gerber, J.G. & Kerr, B.M. Delavirdine: clinical pharmacokinetics and drug interactions. *Clin. Pharmacokinet.* **40**, 207-226 (2001).
- Tran T.T., *et al.* Inhibiting TGF-beta signaling restores immune surveillance in the SMA-560 glioma model. *Neuro. Oncol.* **9**, 259-270 (2007).
- Traut, M., Brode, E., Neumann, B. & Kummer, H. Pharmacokinetics of amezinium in rat and dog. *Arzneimittelforschung* **31**, 1594-1604 (1981).
- Trieu V. N., Liu R., Liu X. P. & Uckun F. M. A specific inhibitor of janus kinase-3 increases survival in a transgenic mouse model of amyotrophic lateral sclerosis. *Biochem. Biophys. Res. Commun.* **267**, 22-25 (2000).
- Tsuneizumi, T., Babb, S.M. & Cohen, B.M. Drug distribution between blood and brain as a determinant of antipsychotic drug effects. *Biol. Psychiatry* **32**, 817-24 (1992).
- Tubic-Grozdanic, M. *et al.* Pharmacokinetics of the CYP 3A substrate simvastatin following administration of delayed versus immediate release oral dosage forms. *Pharm. Res.* **25**, 1591-1600 (2008).
- Tyndale, R.F. & Sellers, E.M. Variable CYP2A6-mediated nicotine metabolism alters smoking behavior and risk. *Drug Metab. Dispos.* **29**, 548-552 (2001).
- Uhr, M., Namendorf, C., Grauer, M.T., Rosenhagen, M. & Ebinger, M. P-glycoprotein is a factor in the uptake of dextromethorphan, but not of melperone, into the mouse brain: evidence for an overlap in substrate specificity between P-gp and CYP2D6. *J. Psychopharmacol.* **18**, 509-515 (2004).
- Uphagrove, A.L. & Nelson, W.L. Importance of amine pKa and distribution coefficient in the metabolism of fluorinated propranolol analogs: metabolism by CYP1A2. *Drug Metab. Dispos.* **29**, 1389-1395 (2001).
- Uphagrove, A.L. & Nelson, W.L. Importance of amine pKa and distribution coefficient in the metabolism of fluorinated propranolol derivatives. Preparation, identification of metabolite regioisomers, and metabolism by CYP2D6. *Drug Metab. Dispos.* **29**, 1377-1388 (2001).
- Urichuk, L., Prior, T.I., Dursun, S. & Baker, G. Metabolism of atypical antipsychotics: involvement of cytochrome p450 enzymes and relevance for drug-drug interactions. *Curr. Drug Metab.* **9**, 410-418 (2008).
- van Vliet, E.A. *et al.* Region-specific overexpression of P-glycoprotein at the blood-brain barrier affects brain uptake of phenytoin in epileptic rats. *J. Pharmacol. Exp. Ther.* **322**, 141-147 (2007).
- Varma, M.V., Sateesh, K. & Panchagnula, R. Functional role of P-glycoprotein in limiting intestinal absorption of drugs: contribution of passive permeability to P-glycoprotein mediated efflux transport. *Mol. Pharm.* **2**, 12-21 (2005).
- Vasudevan, A. *et al.* Aminopiperidine indazoles as orally efficacious melanin concentrating hormone receptor-1 antagonists. *Bioorg. Med. Chem. Lett.* **15**, 5293-5297 (2005).
- Vautier, S. *et al.* Interactions between the dopamine agonist, bromocriptine and the efflux protein, P-glycoprotein at the blood-brain barrier in the mouse. *Eur. J. Pharm. Sci.* **27**, 167-174 (2006).
- Velentza A. V., *et al.* An aminopyridazine-based inhibitor of a pro-apoptotic protein kinase attenuates hypoxia-ischemia induced acute brain injury. *Bioorg. Med. Chem. Lett.* **13**, 3465-3470 (2003).
- Venkatakrishnan, K., von Moltke, L.L. & Greenblatt, D.J. Nortriptyline E-10-hydroxylation in vitro is mediated by human CYP2D6 (high affinity) and CYP3A4 (low affinity): implications for interactions with enzyme-inducing drugs. *J. Clin. Pharmacol.* **39**, 567-577 (1999).
- Vincent, S.H., Shambhu, M.B. & Digenis, G.A. Synthesis of [<sup>82</sup>Br]bromperidol and preliminary tissue distribution studies in the rat. *J. Med. Chem.* **23**, 75-79 (1980).
- Vieth M, *et al.* Characteristic physical properties and structural fragments of marketed oral drugs. *J. Med. Chem.* **47**, 224-232 (2004).
- von Bahr, C. *et al.* Fluvoxamine but not citalopram increases serum melatonin in healthy subjects--an indication that cytochrome P450 CYP1A2 and CYP2C19 hydroxylate melatonin. *Eur J. Clin. Pharmacol.* **56**, 123-127 (2000).
- von Moltke, L.L. *et al.* Interaction of triazolam and ketoconazole in P-glycoprotein-deficient mice. *Drug Metab. Dispos.* **32**, 800-804 (2004).
- Wala, E.P., Sloan, J.W. & Jing, X. Pharmacokinetics of the peripheral benzodiazepine receptor antagonist, PK 11195, in rats. The effect of dose and gender. *Pharmacol. Res.* **41**, 461-468 (2000).
- Wang, C., Quan, L.H., Guo, Y., Liu, C.Y. & Liao, Y.H. Uptake and biodistribution of rizatriptan to blood and brain following different routes of administration in rats. *International journal of pharmaceutics* **337**, 155-160 (2007).
- Wang, E. *et al.* Quantitative distinctions of active site molecular recognition by P-glycoprotein and cytochrome P450 3A4. *Chem. Res. Toxicol.* **14**, 1596-1603 (2001).
- Wang F., *et al.* Inhibition of cyclin-dependent kinases improves CA1 neuronal survival and behavioral performance after global ischemia in the rat. *J. Cereb. Blood Flow Metab.* **22**, 171-182 (2002).
- Wang, J.S., Zhu, H.J., Markowitz, J.S., Donovan, J.L. & DeVane, C.L. Evaluation of antipsychotic drugs as inhibitors of multidrug resistance transporter P-glycoprotein. *Psychopharmacology (Berl)* **187**, 415-423 (2006).
- Wang, R.W., Liu, L. & Cheng, H. Identification of human liver cytochrome P450 isoforms involved in the in vitro metabolism of cyclobenzaprine. *Drug Metab. Dispos.* **24**, 786-791 (1996).
- Wang W., *et al.* Inhibition of glycogen synthase kinase-3beta protects dopaminergic neurons from MPTP toxicity. *Neuropharm.* **52**, 1678-1684 (2007).
- Wang W., *et al.* SP600125, a new JNK inhibitor, protects dopaminergic neurons in the MPTP model of Parkinson's disease. *Neurosci. Res.* **48**, 195-202 (2004).

- Wang, Y.H., Li, Y., Li, Y.H., Yang, S.L. & Yang, L. Modeling K(m) values using electrotopological state: substrates for cytochrome P450 3A4-mediated metabolism. *Bioorg. Med. Chem. Lett.* **15**, 4076-4084 (2005).
- Wang Z. Q., Wu D. C., Huang F. P. & Yang G. Y. Inhibition of MEK/ERK 1/2 pathway reduces pro-inflammatory cytokine interleukin-1 expression in focal cerebral ischemia. *Brain Res.* **996**, 55-66 (2004).
- Ward, B.A. *et al.* Characterization of human cytochrome P450 enzymes catalyzing domperidone N-dealkylation and hydroxylation in vitro. *Br. J. Clin. Pharmacol.* **58**, 277-287 (2004).
- Ward, K.W. *et al.* SB-242235, a selective inhibitor of p38 mitogen-activated protein kinase. I: preclinical pharmacokinetics. *TXEN* **32**, 221-233 (2002).
- Ward, S.E. *et al.* Studies on a series of potent, orally bioavailable, 5-HT(1) receptor ligands. *Bioorg. Med. Chem. Lett.* **17**, 5214-5217 (2007).
- Watanabe, M., Tateishi, T., Tanaka, M., Kumai, T. & Kobayashi, S. Role of CYP3A in bromperidol metabolism in rat in vitro and in vivo. *Xenobiotica* **29**, 839-846 (1999).
- Webster, R. *et al.* Pharmacokinetics and disposition of a novel NMDA glycine site antagonist (UK-240,455) in rats, dogs and man. *Xenobiotica* **33**, 541-560 (2003).
- Weishaupt, J. H., *et al.* Inhibition of CDK5 is protective in necrotic and apoptotic paradigms of neuronal cell death and prevents mitochondrial dysfunction. *Mol. Cell Neurosci.* **24**, 489-502 (2003).
- Weiss, J., Theile, D., Ketabi-Kiyavash, N., Lindenmaier, H. & Haefeli, W.E. Inhibition of MRP1/ABCC1, MRP2/ABCC2, and MRP3/ABCC3 by nucleoside, nucleotide, and non-nucleoside reverse transcriptase inhibitors. *Drug Metab. Dispos.* **35**, 340-344 (2007).
- Wen, P. Y. *et al.* Phase I/II study of imatinib mesylate for recurrent malignant gliomas: North American Brain Tumor Consortium Study 99-08. *Clin. Cancer Res.* **12**, 4899-4907 (2006).
- Wiesel, F.A. & Alfredsson, G. The distribution and metabolism of chlorpromazine in rats and the relationship to effects on cerebral monoamine metabolism. *Eur. J. Pharmacol.* **40**, 263-272 (1976).
- Wilkinson, J.M. & Pollard, I. Accumulation of theophylline, theobromine and paraxanthine in the fetal rat brain following a single oral dose of caffeine. *Brain Res. Dev. Brain Res.* **75**, 193-199 (1993).
- Wojcikowski, J., Pichard-Garcia, L., Maurel, P. & Daniel, W.A. Contribution of human cytochrome p-450 isoforms to the metabolism of the simplest phenothiazine neuroleptic promazine. *Br. J. Pharmacol.* **138**, 1465-1474 (2003).
- Wustrow, D.J. *et al.* Oxadiazolone bioisosteres of pregabalin and gabapentin. *Bioorg. Med. Chem. Lett.* **19**, 247-250 (2009).
- Yamaori, S. *et al.* Effects of cytochrome b(5) on drug oxidation activities of human cytochrome P450 (CYP) 3As: similarity of CYP3A5 with CYP3A4 but not CYP3A7. *Biochem. Pharmacol.* **66**, 2333-2340 (2003).
- Yamazaki, H. *et al.* Comparative studies on the catalytic roles of cytochrome P450 2C9 and its Cys- and Leu-variants in the oxidation of warfarin, flurbiprofen, and diclofenac by human liver microsomes. *Biochem. Pharmacol.* **56**, 243-251 (1998).
- Yang, K.H., Lee, J.H. & Lee, M.G. Effects of CYP inducers and inhibitors on the pharmacokinetics of intravenous theophylline in rats: involvement of CYP1A1/2 in the formation of 1,3-DMU. *J Pharm Pharmacol* **60**, 45-53 (2008).
- Yang, T.J. *et al.* Role of cDNA-expressed human cytochromes P450 in the metabolism of diazepam. *Biochem. Pharmacol.* **55**, 889-896 (1998).
- Yang, Z., He, X. & Zhang, Y. The determination of raloxifene in rat tissue using HPLC. *Biomed Chromatogr* **21**, 229-233 (2007).
- Yata, N., Toyoda, T., Murakami, T., Nishiura, A. & Higashi, Y. Phosphatidylserine as a determinant for the tissue distribution of weakly basic drugs in rats. *Pharm. Res.* **7**, 1019-1025 (1990).
- Yatsushige H., Ostrowski R. P., Tsubokawa T., Colohan A. & Zhang J. H. Role of c-Jun N-terminal kinase in early brain injury after subarachnoid hemorrhage. *J. Neurosci. Res.* **85**, 1436-1448 (2007).
- Yazdaniyan, M. Blood-brain barrier properties of human immunodeficiency virus antiretrovirals. *J. Pharm. Sci.* **88**, 950-954 (1999).
- Yoshii, K. *et al.* Identification of human cytochrome P450 isoforms involved in the 7-hydroxylation of chlorpromazine by human liver microsomes. *Life Sci.* **67**, 175-184 (2000).
- Young, R.C. *et al.* Development of a new physicochemical model for brain penetration and its application to the design of centrally acting H2 receptor histamine antagonists. *J. Med. Chem.* **31**, 656-671 (1988).
- Yueh, T.L. & Chu, H.Y. The metabolic fate of daidzein. *Sci Sin* **20**, 513-521 (1977).
- Yumibe, N. *et al.* Identification of human liver cytochrome P450 enzymes that metabolize the non-sedating antihistamine loratadine. Formation of descarboethoxyloratadine by CYP3A4 and CYP2D6. *Biochem. Pharmacol.* **51**, 165-172 (1996).
- Zahlsen, K., Eide, I., Nilsen, A.M. & Nilsen, O.G. Inhalation kinetics of C8 to C10 1-alkenes and iso-alkanes in the rat after repeated exposures. *Pharmacol. Toxicol.* **73**, 163-168 (1993).
- Zarate C. A. Jr., *et al.* Efficacy of a protein kinase C inhibitor (tamoxifen) in the treatment of acute mania: a pilot study. *Bipolar Disord.* **9**, 561-570 (2007).
- Zhang D., Kanthasamy A., Yang Y., Anantharam V. & Kanthasamy A. Protein kinase C delta negatively regulates tyrosine hydroxylase activity and dopamine synthesis by enhancing protein phosphatase-2A activity in dopaminergic neurons. *J. Neurosci.* **27**, 5349-5362 (2007).
- Zhang, G., Terry, A.V., Jr. & Bartlett, M.G. Sensitive liquid chromatography/tandem mass spectrometry method for the simultaneous determination of olanzapine, risperidone, 9-hydroxyrisperidone, clozapine, haloperidol and ziprasidone in rat brain tissue. *J. Chromatogr. B Analyt. Technol. Biomed. Life Sci.* **858**, 276-281 (2007).
- Zhang, J., McCarthy, T.J., Moore, W.M., Currie, M.G. & Welch, M.J. Synthesis and evaluation of two positron-labeled nitric oxide synthase inhibitors, S-[11C]methylisothiourea and S-(2-[18F]fluoroethyl)isothiourea, as potential positron emission tomography tracers. *J. Med. Chem.* **39**, 5110-5118 (1996).
- Zhao W. Q., *et al.* Inhibitors of cAMP-dependent protein kinase impair long-term memory formation in day-old chicks. *Neurobiol. Learn. Mem.* **64**, 106-118 (1995).
- Zhao, S.H. *et al.* 3,4-Dihydro-2H-benzo[1,4]oxazine derivatives as 5-HT6 receptor antagonists. *Bioorg. Med. Chem. Lett.* **17**, 3504-3507 (2007).
- Zhou, C., Shen, P. & Cheng, Y. Quantitative study of the drug efflux kinetics from sensitive and MDR human breast cancer cells. *Biochim Biophys Acta* **1770**, 1011-1020 (2007).
- Zhou, J., *et al.* Pharmacological inhibition of mTORC1 suppresses anatomical, cellular, and behavioral abnormalities in neural-specific Pen knock-out mice. *J. Neurosci.* **29**, 1773-1783 (2009).
- Zhou Y., *et al.* Nonsteroidal anti-inflammatory drugs can lower amyloidogenic Abeta42 by inhibiting Rho. *Science* **302**, 1215-1217 (2003).
- Zhu, B. *et al.* Characterization of 1'-hydroxymidazolam glucuronidation in human liver microsomes. *Drug Metab. Dispos.* **36**, 331-338 (2008).
